# The endophilin curvature-sensitive motif requires electrostatic guidance to recycle synaptic vesicles *in vivo*

Lin Zhang<sup>1,†</sup>, Yu Wang<sup>1,2,3,†</sup>, Yongming Dong<sup>1</sup>, Aaradhya Pant<sup>1</sup>, Yan Liu<sup>1</sup>, Laura Masserman<sup>1</sup>, Richard N McLaughlin Jr<sup>4</sup>, Jihong Bai<sup>1,#</sup>

<sup>1</sup> Basic Sciences Division, Fred Hutchinson Cancer Research Center, Seattle, WA 98109

<sup>2</sup> School of Life Sciences, Westlake University, Hangzhou, Zhejiang, P. R. China, 310024

<sup>3</sup> Fudan University, Shanghai, P. R. China, 200433

<sup>4</sup> Pacific Northwest Research Institute, Seattle, WA 98122

† These authors contributed equally to this work

# Jihong Bai, Ph.D. (Lead Contact and corresponding author)

Basic Sciences Division

Fred Hutchinson Cancer Research Center

1100 Fairview Ave N.

Seattle, WA 98109, USA

Email: [jbai@fredhutch.org](mailto:jbai@fredhutch.org)

## Abstract

Curvature-sensing mechanisms assist proteins in executing particular actions on various membrane organelles. Here, we investigated the functional specificity of curvature-sensing amphipathic motifs through the study of endophilin, an endocytic protein for synaptic vesicle recycling. We generated chimeric endophilin proteins by replacing the endophilin amphipathic motif H0 with other curvature-sensing amphipathic motifs. We found that the role of amphipathic motifs cannot simply be extrapolated from the identity of their parental proteins. For example, the amphipathic motif of the nuclear pore complex protein NUP133 functionally replaced the synaptic role of endophilin H0. Interestingly, non-functional endophilin chimeras had similar defects – producing fewer synaptic vesicles but more endosomes – indicating that the curvature-sensing motifs in these chimeras have a common deficiency at reforming synaptic vesicles. Finally, we converted non-functional endophilin chimeras into functional proteins by changing the cationic property of amphipathic motifs, setting a precedent for reprogramming the functional specificity of curvature-sensing motifs *in vivo*.

## Introduction

Eukaryotic cells manage a network of membrane organelles that perform specific functions. Research on curvature-sensing mechanisms has intensified in recent years, as these principles show promise in coupling membrane morphology to biological activities (Antonny, 2011; Jarsch et al., 2016; McMahon and Gallop, 2005; Prinz and Hinshaw, 2009; Shibata et al., 2009). Such efforts have led to the identification of many curvature-sensing domains and motifs in proteins with various cellular functions, raising a possibility that curvature-sensing mechanisms assist proteins to perform specific activities on distinct membrane organelles. Yet, how exactly these mechanisms provide specific guidance to proteins *in vivo* remains largely unknown.

One class of curvature-sensing modules consists of amphipathic motifs, which are short membrane-binding sequences found in many proteins and peptides (Bigay and Antonny, 2012; Drin and Antonny, 2010; Gimenez-Andres et al., 2018; Jarsch et al., 2016; Shibata et al., 2009). In solution, the amphipathic motifs are disordered. Upon contact with curved membranes, they fold into a helical structure, with polar and nonpolar residues segregated into two faces of the helix (Cornell and Taneva, 2006; Kaiser and Kezdy, 1983; 1984; Sargent et al., 1988). The amphipathic helices lay parallel onto membranes with residues in the nonpolar face embedded within the membrane hydrophobic core, and residues in the polar face oriented towards the aqueous cytoplasm and lipid headgroups (Hristova et al., 1999). The hydrophobic residues in the nonpolar face recognize lipid packing defects of curved membranes, consequently enabling curvature-dependent binding of amphipathic motifs to membranes (Bartels et al., 2010; Cui et al., 2011; Gonzalez-Rubio et al., 2011; Hatzakis et al., 2009; Vanni et al., 2013).

While attempting to understand the diversity among amphipathic motifs, biochemical studies were conducted which found a number of factors that influence the curvature sensitivity of these motifs *in vitro*. For instance, the composition of amino acid residues in the polar face has a strong impact on curvature sensitivity. The Amphipathic-Lipid-Packing-Sensor (ALPS) motifs, which have polar faces

that mainly contain serine and threonine residues, are highly sensitive to membrane curvature (Drin and Antonny, 2010; Drin et al., 2007). In comparison, amphipathic motifs that have polar faces with abundant basic residues, and can thus bind anionic membranes through electrostatic interactions, are therefore thought to be less selective to curvature (Drin et al., 2007). Besides hydrophilic and charged residues in the polar face, the curvature-dependent membrane interactions of amphipathic motifs could be tuned by a number of additional parameters including the size and the density of hydrophobic residues in the nonpolar face (Bigay et al., 2005; Boucrot et al., 2012; Farsad et al., 2001; Ford et al., 2002; Gallop et al., 2006; Krauss et al., 2008; Lee et al., 2005; Masuda et al., 2006; Suresh and Edwardson, 2010), the length of the amphipathic motifs (Braun et al., 2017; Copic et al., 2018; McLean et al., 1991), the surrounding protein backbones (Doucet et al., 2015), and posttranslational modifications (Karanasios et al., 2010). These findings show a high degree of biochemical distinctions among amphipathic motifs, suggesting that these motifs could be further sorted into subgroups *in vitro* (Gimenez-Andres et al., 2018). However, little is known about the level of functional specificity these motifs display *in vivo*. For example, can an amphipathic motif be replaced by another one without leading to functional deficiency? Do amphipathic motifs with different *in vitro* properties always show clear functional distinction *in vivo*? What key features need to be altered to make a non-functional amphipathic motif into a functional one? These are major questions to be answered.

Endophilin-A (hereafter endophilin) is one of the best characterized endocytic proteins in neurons (Bai et al., 2010; Dickman et al., 2005; Kittelmann et al., 2013; Kroll et al., 2019; Milosevic et al., 2011; Schuske et al., 2003; Verstreken et al., 2002; Watanabe et al., 2018) and non-neuronal cells (Boucrot et al., 2015; Ferreira and Boucrot, 2018; Poudel et al., 2018; Renard et al., 2015; Renard et al., 2020). It harbors an amphipathic motif H0 at its N-terminus, a Bin-Amphiphysin-Rvs (BAR) domain in the middle, and an SH3 domain at its C-terminus (Farsad et al., 2001; Gallop et al., 2006; Peter et al., 2004; Ringstad et al., 1997; Weissenhorn, 2005). Removal of endophilin from neurons leads to profound synaptic defects including a reduced pool of synaptic vesicles, decreased levels of synaptic

transmission, and slowed recycling of synaptic vesicle proteins and membranes (Bai *et al.*, 2010; Dickman *et al.*, 2005; Kittelmann *et al.*, 2013; Kroll *et al.*, 2019; Milosevic *et al.*, 2011; Schuske *et al.*, 2003; Verstreken *et al.*, 2002; Watanabe *et al.*, 2018). The importance of endophilin H0 for supporting endocytosis is well established. Truncated endophilin that lacks the H0 motif folds correctly (Cui *et al.*, 2013; Poudel *et al.*, 2016), but it fails to sustain synaptic vesicle recycling in neurons (Bai *et al.*, 2010), and it loses the ability to promote endocytic uptake of membranes in non-neuronal cells (Boucrot *et al.*, 2015). Like other amphipathic motifs, endophilin H0 is disordered in solution (Bhatia *et al.*, 2009; Gallop *et al.*, 2006; Low *et al.*, 2008). It folds rapidly into an amphipathic helix on membranes containing anionic lipids (Capraro *et al.*, 2013; Poudel *et al.*, 2016), with side chains of nonpolar residues penetrating into the lipid bilayer (Cui *et al.*, 2011; Jao *et al.*, 2010). Because of the functional importance of the H0 motif, extensive effort has been put forward to elucidate the biochemical and biophysical basis for the interactions between endophilin H0 and membranes (Ambroso *et al.*, 2014; Bhatia *et al.*, 2009; Blood *et al.*, 2008; Boucrot *et al.*, 2012; Capraro *et al.*, 2013; Chen *et al.*, 2016b; Cui *et al.*, 2011; Cui *et al.*, 2013; Hatzakis *et al.*, 2009; Low *et al.*, 2008; Poudel *et al.*, 2016). It is generally agreed that the H0 motif possesses the curvature-sensing activity essential for endophilin to bind curved membranes. The insertion of amphipathic H0 assists endophilin to generate membrane curvature by actively bending membranes (Campelo *et al.*, 2008; Low *et al.*, 2008; Poudel *et al.*, 2016; Sodt and Pastor, 2014), passively stabilizing lipid packing defects presented on bent membranes (Bhatia *et al.*, 2009; Chen *et al.*, 2016b; Cui *et al.*, 2011; Hatzakis *et al.*, 2009; Poudel *et al.*, 2016), or enhancing steric repulsion arising from protein crowding on membranes (Chen *et al.*, 2016a; Stachowiak *et al.*, 2012). In addition, the activity of endophilin H0 can be tuned by phosphorylation (Kaneko *et al.*, 2005) and its interaction with the SH3 domain of endophilin (Chen *et al.*, 2014; Vazquez *et al.*, 2013; Wang *et al.*, 2008), which are modulatory mechanisms requiring specific protein sequences. Collectively, these studies suggest that the H0 motif is a special amphipathic motif necessary for the activity of endophilin *in vitro*. However, the specificity of endophilin H0 has not been examined *in vivo*.

In this study, we generated endophilin chimeras by replacing endophilin H0 with other curvature-sensing amphipathic helical motifs. Our results showed that only a subset of amphipathic motifs could support endophilin's synaptic activity in neurons, demonstrating functional specificity among amphipathic motifs *in vivo*. While endophilin H0 could be functionally replaced by an ALPS motif of the nuclear pore complex protein NUP133, another ALPS motif, from the oxysterol-binding protein KES1, failed to substitute for endophilin H0. Therefore, the specificity of an amphipathic motif cannot be simply extrapolated from the function of its parental protein. Through ultrastructural analyses, we found that endophilin chimeras carrying non-functional curvature-sensing motifs induce the abnormal accumulation of endosome-like structures at synapses, suggesting a common defect in the process of resolving endosomes into synaptic vesicles. Finally, we successfully converted non-functional endophilin chimeras into functional ones by changing the cationic property of the amphipathic motifs. We showed that the functional improvement was due to changes of the net charge levels instead of the exact position of charges, the type of mutations, or the amino acid sequences of the amphipathic motifs. Collectively, this study demonstrated for the first time how electrostatic and curvature-sensing mechanisms of H0 work together to provide specific guidance to endophilin function *in vivo*.

## Results

### ***The linker region between rEndoA1 H0 and the BAR domain tolerates changes.***

In support of a conserved function of endophilin in invertebrate and vertebrate neurons, we found that neuronal expression of the GFP-tagged full-length rat endophilin A1 (rEndoA1, Fig.1A), using a single-copy transgene (*snb-1p::rEndoA1::gfp*), fully restored the locomotion rates (Fig.1B) and synaptic currents at neuromuscular junctions in *unc-57 endophilin null* mutant worms (Fig.1C, 1D). On the other hand, removal of the H0 motif from rEndoA1 ( $\Delta$ H0) completely abolished the rescue activity of rEndoA1 in *unc-57* mutants (Fig.S1).

To understand how the N-terminal amphipathic helix H0 works in the context of full-length endophilin, we examined the linker region between H0 and the BAR domain. In wild type rEndoA1, the H0 motif is

connected to the BAR domain of endophilin via a short GlyGlyAla linker (Fig.1A), suggesting a flexible nature of the connection. To determine whether the linker requires a particular length of amino acid residues, we generated mutant versions of rEndoA1 that carry additional residues of Gly, GlyGly, and GlyGlyAla before the BAR domain (indicated by the arrow in Fig.1A). Our data showed that mutant rEndoA1 with altered linkers exhibited similar levels of rescue activity in restoring locomotion rates (Fig.1B), the frequency of endogenous excitatory postsynaptic currents (EPSCs) (Fig.1C), and the amplitude of evoked EPSCs in response to electrical stimulation (Fig.1D). Together, these data indicate that the flexible linker that connects the amphipathic helix H0 to the rEndoA1 BAR domain can tolerate changes to its amino acid residue sequence.

### ***Endophilin H0 carries functional specificity in vivo.***

We next sought to examine the functional specificity of endophilin H0 *in vivo*. To this end, we generated an array of rEndoA1 chimeras that carry amphipathic motifs from various proteins in place of endophilin H0 (Fig. 2A-B). The amphipathic motifs grafted into these endophilin chimeras have different primary sequences. However, like endophilin H0, they are all known curvature sensors as shown by biochemical studies, *i.e.*, they preferentially bind highly curved membranes *in vitro* (Drin and Antonny, 2010). The rEndoA1 chimeras were expressed in neurons using single-copy transgenes, and the expression levels of rEndoA1 chimeras were measured by determining the GFP fluorescence intensity around the *C. elegans* nerve ring (a tight bundle of neuronal processes of sensory and interneurons). Imaging results showed that rEndoA1 chimeras were expressed in neurons at similar levels to wild type rEndoA1 (Fig.S2).

To determine whether the function of endophilin H0 *in vivo* could be replaced by other curvature-sensing amphipathic motifs, we examined locomotion rates of transgenic *unc-57 endophilin* mutant worms expressing various rEndoA1 chimeras (Fig.2C-D). We found that several of these rEndoA1 chimeras significantly recovered the locomotion defects in *unc-57 endophilin* mutants. Among these, amphipathic motifs from BIN1 (Bridging Integrator 1, also known as Amphiphysin-2; (Low *et al.*,

2008)), NUP133 (Nucleoporin 133, a component of the nuclear pore complex; (Doucet et al., 2010)), and Nadrin2 (Rho GTPase activating protein 17; (Galic et al., 2012)) significantly restored rEndoA1 H0 function. And yet other amphipathic motifs, including those from synaptic vesicle binding proteins (e.g., complexin CPX-1 (Snead et al., 2014; Wragg et al., 2013),  $\alpha$ -Synuclein (Davidson et al., 1998; Georgieva et al., 2008; Jao et al., 2008)) and intracellular membrane trafficking (e.g., ARF1 (Goldberg, 1998), KES1 (Im et al., 2005; Moser von Filseck et al., 2015), and Sar1p (Lee et al., 2005)), either failed or had only minor activity in substituting rEndoA1 *in vivo*. These results demonstrate that endophilin H0 could carry a level of functional specificity that is only shared by a subset of curvature-sensing amphipathic motifs. Interestingly, such functional specificity could not be extrapolated from the cellular activity or localization of the parent proteins harboring the amphipathic motifs. For example, NUP133 functions at nuclear pores (Doucet et al., 2010; Lutzmann et al., 2002; Nordeen et al., 2020), but its amphipathic motif could replace the function of rEndoA1 H0 at synapses. Together, these data suggest that additional mechanisms, beyond sensing membrane curvature, need to be engaged for defining *in vivo* specificity of amphipathic motifs.

### **Two ALPS motifs show drastic differences in their ability to replace rEndoA1 H0 at synapses.**

To understand the functional specificity of amphipathic motifs, we focused on two chimeric proteins: NUP133\_rEndoA1 and KES1\_rEndoA1. Biochemical studies have shown that the amphipathic motifs of NUP133 and KES1 act in a similar way to sense membrane curvature *in vitro*, and thereafter recognized them as two founding members of the family of ALPS motifs (Drin et al., 2007). Despite the biochemical similarity, NUP133 and KES1 ALPS motifs exhibited drastic differences in their ability to replace rEndoA1 H0 *in vivo* (Fig.2D). Expression of NUP133\_rEndoA1 in *unc-57 endophilin* mutants significantly improved locomotion rates (with NUP133\_rEndoA1 worms moving at ~127  $\mu$ m/s, vs. *unc-57* mutants at ~18  $\mu$ m/s). By contrast, worms carrying the KES1\_rEndoA1 chimera had locomotion rates of ~44  $\mu$ m/s, which was significantly less than that of NUP133\_rEndoA1 worms.

One possible reason for the functional deficiency of KES1\_rEndoA1 was that this chimeric protein failed to localize to synapses. To examine this possibility, we compared the synaptic and axonal distribution of the proteins rEndoA1 wild type (wt), the H0-truncated mutant ( $\Delta$ H0), NUP133\_rEndoA1, and KES1\_rEndoA1, which were all tagged with mScarlet (a red fluorescent protein) (Fig.2E). We found that fluorescently-labeled wild type endophilin was highly enriched in synaptic puncta. In contrast, the fluorescence intensity of the  $\Delta$ H0 mutant puncta was significantly reduced, as previously reported (Bai *et al.*, 2010) (Fig.2E). The synaptic and axonal distribution of both NUP133\_rEndoA1 and KES1\_rEndoA1 proteins was identical to that of wild type rEndoA1 (Fig.2E). These data show that the KES1\_rEndoA1 was trafficked to synapses and enriched there, yet it could not fully replace the function of endophilin. Therefore, mechanisms other than protein-trafficking defects are needed to explain the functional difference between NUP133\_rEndoA1 and KES1\_rEndoA1.

To define the synaptic activity of NUP133\_rEndoA1 and KES1\_rEndoA1, we examined the levels of synaptic transmission using electrophysiological recordings. Due to their endocytosis defects, *unc-57 endophilin* mutants have a smaller pool of synaptic vesicles and a corresponding decrease in synaptic transmission (Bai *et al.*, 2010; Kittelmann *et al.*, 2013; Schuske *et al.*, 2003). Specifically, *unc-57 endophilin* mutants had a decreased rate of endogenous EPSCs at neuromuscular junctions (Fig.3A, endogenous EPSC rates: wt  $53 \pm 3$  Hz, *unc-57*  $11 \pm 1$  Hz;  $p < 0.001$ ), while the mean amplitude of endogenous EPSCs was not altered. The amplitude of evoked EPSCs in *unc-57* mutants was also significantly reduced to  $0.95 \pm 0.1$  nA, compared to  $3.2 \pm 0.2$  nA in wild type worms (Fig.3B;  $p < 0.001$ ). These defects of synaptic transmission in *unc-57 endophilin* mutants were fully rescued upon expression of chimeric NUP133\_rEndoA1 (Fig.3A, NUP133\_rEndoA1 endogenous EPSC rate:  $64 \pm 4$  Hz, and Fig.3B, evoked EPSC amplitude:  $3.9 \pm 0.2$  nA), demonstrating a functional similarity between the NUP133 ALPS motif and rEndoA1 H0. In comparison, KES1\_rEndoA1 showed only partial activity for improving synaptic transmission in *unc-57 endophilin* mutants (Fig.3A, KES1\_rEndoA1 endogenous EPSC rate:  $26 \pm 2$  Hz, and Fig.3B, evoked EPSC amplitude:  $1.6 \pm 0.2$  nA). Together,

these results demonstrate that for sustaining synaptic transmission *in vivo*, the NUP133 ALPS is a more efficient substitute for the role of endophilin H0 motif than the KES1 ALPS.

To determine the impact of NUP133\_rEndoA1 and KES1\_rEndoA1 on synaptic vesicle recycling, we used imaging analysis to follow the release and retrieval of synaptic vesicles from the glutamatergic neuron ASH in intact worms (Ventimiglia and Bargmann, 2017). As shown in Fig.3C, a pH-sensitive GFP (super-ecliptic pHluorin) was inserted into the first lumenal domain of the vesicular glutamate transporter EAT-4 (VGLUT), resulting in a fluorescent VGLUT-pHluorin reporter. At the resting state, VGLUT-pHluorin fluorescence was quenched by the acidic pH of the vesicle lumen. Synaptic vesicle exocytosis delivered VGLUT-pHluorin to the plasma membrane, resulting in an increase of green fluorescence due to de-quenching of pHluorin at neutral extracellular pH. Subsequently, endocytosis and reacidification took place, returning VGLUT-pHluorin back to the quenched state. As expected, *unc-57 endophilin* mutants had significantly slowed VGLUT-pHluorin retrieval after stimulus removal (Fig.3D and 3F left panel), showing that the speed of synaptic vesicle recycling is impaired in neurons lacking endophilin. In addition, baseline VGLUT-pHluorin fluorescence in the ASH neuron was higher in *unc-57 endophilin* mutants than in wild type worms (Fig.3F right panel), indicating that an elevated level of VGLUT-pHluorin remained on the cell surface at steady-state. These results were consistent with previous reports showing the importance of endophilin for recycling synaptic vesicles (Bai *et al.*, 2010; Dickman *et al.*, 2005; Kittelmann *et al.*, 2013; Kroll *et al.*, 2019; Milosevic *et al.*, 2011; Schuske *et al.*, 2003; Verstreken *et al.*, 2002; Watanabe *et al.*, 2018). Expression of NUP133\_rEndoA1 fully recovered the retrieval rates (Fig.3E left panel and Fig.3F left panel) and the basal levels of surface VGLUT-pHluorin in *unc-57* mutants (Fig.3F right panel). Conversely, expression of KES1\_rEndoA1 failed to accelerate the VGLUT-pHluorin retrieval, *i.e.*, the time constant in KES1\_rEndoA1 neurons was significantly higher than that in wild type or NUP133\_rEndoA1 neurons (Fig.3E right panel and Fig.3F left panel), and similar to that in neurons carrying rEndoA1\_ΔH0 (Fig.3F left panel). These data demonstrate that KES1\_rEndoA1 is less efficient than NUP133\_rEndoA1 in supporting the retrieval of synaptic vesicle protein VGLUT-pHluorin. However, the basal level of surface VGLUT-pHluorin

returned to the wild-type level upon expression of either KES1\_rEndoA1 or NUP133\_rEndoA1, suggesting that KES1\_rEndoA1 could mediate the retrieval of VGLUT-pHluorin from the cell surface, although it is slower and less efficient.

### ***Synapses rescued by the KES1\_rEndo chimera have abnormal endosome-like structures.***

To better understand the deficiency of KES1\_rEndoA1, we performed high-pressure freeze electron microscopy to examine synapses at the ultrastructural level (Fig.4A). Our results identified several abnormal features at KES1\_rEndoA1 synapses. First, the abundance of synaptic vesicles was only partially restored in transgenic *unc-57 endophilin* mutants that carried KES1\_rEndoA1 (Fig.4A and 4B left panel). The number of synaptic vesicles for each synaptic profile was  $39 \pm 2$  for wild type,  $16 \pm 1$  for *unc-57* mutants, and  $26 \pm 1$  for KES1\_rEndoA1 worms (Fig.4B left panel). These ultrastructural data showing a smaller pool of the synaptic vesicles at KES1\_rEndoA1 synapses were consistent with the electrophysiology findings of reduced synaptic transmission (Fig.3A-B). Second, more large clear vesicles (50-100 nm diameter) appeared at KES1\_rEndoA1 synapses (Fig.4C left panel). Synaptic vesicles and large clear vesicles also became larger at KES1\_rEndoA1 synapses (Fig.4B right panel for synaptic vesicles, and Fig.3C right panel for large clear vesicles) than those in wild type or *unc-57* mutant synapses. Because the amplitude of endogenous EPSCs remained unchanged at KES1\_rEndoA1 synapses, the enlarged vesicles were likely deficient for releasing neurotransmitters. Third, we found a significant increase in the number of endosome-like structures (>100 nm in diameter) at KES1\_rEndoA1 synapses (0 for wild type,  $0.4 \pm 0.1$  per synapse in *unc-57* mutants, and  $1.5 \pm 0.2$  per KES1\_rEndoA1 synapse; Fig.4D left panel). Moreover, as shown in the Fig.4D right panel, the endosome-like structures occurred more frequently at KES1\_rEndoA1 synapses (16 out of 18) than at *unc-57* mutant synapses (9 out of 25). These increases in abundance and frequency of endosome-like structures at KES1\_rEndoA1 synapses were surprising, and raised questions regarding the source of membranes for producing the endosome-like structures. Because our results showed that KES1\_rEndoA1 synapses had fewer synaptic vesicles but more endosome-like structures, we examined the possibility that endosome-like structures and synaptic vesicles compete

for membranes. Consistent with this idea, we found an inverse correlation between the synaptic vesicle abundance and the size of endosome-like structures at synapse (Fig.4E), supporting a competitive nature between these two distinct types of membrane organelles.

Next, we sought to determine factors that limit the ability of the KES1 ALPS motif to replace endophilin H0. We reasoned that if we could identify strategies to improve the function of KES1\_rEndoA1 at synapses, the resulting knowledge would lead to a deeper understanding of how endophilin H0 works *in vivo*. To this end, we first looked into biochemical differences among endophilin H0, NUP133 ALPS, and KES1 ALPS motifs. It was previously suggested that the abundance of basic residues is a major factor that differentiates endophilin H0 from members in the ALPS family (Drin and Antonny, 2010; Drin *et al.*, 2007). Interestingly, while the ALPS motifs of NUP133 and KES1 both belong to the ALPS family (Drin *et al.*, 2007), they have different cationic levels. As shown in Fig.5A, the KES1 ALPS motif has a net charge level of 0, and the NUP133 ALPS motif has a net charge level of +2, whereas rEndoA1 H0 has a net charge level of +4. Alignment of amphipathic helix sequences showed that the net charge levels of KES1, NUP133, and rEndoA1 motifs remained largely constant across orthologs from various species (Fig.S3), suggesting that the levels of positive charges of these motifs are preserved during evolution.

### ***The charge level of KES1\_ALPS limits its potential to substitute endophilin H0 in vitro.***

To determine how grafted amphipathic motifs influence chimeric rEndoA1, we used electron microscopy to study the ability of chimeric rEndoA1 to generate membrane tubules. Previous studies showed that the membrane tubulation activity of wild type endophilin requires interactions with lipids of negatively charged headgroups (e.g., phosphatidylserine PS and phosphatidylinositol 4,5-bisphosphate PIP2) (Farsad *et al.*, 2001; Gallop *et al.*, 2006; Jao *et al.*, 2004; Masuda *et al.*, 2006). Consistent with these early findings, our control experiments showed that wild type rEndoA1 generated more, and longer, membrane tubules on liposomes with correspondingly increased amounts of negatively charged lipids (Fig.S4). When we compared NUP133\_rEndoA1 and wild type

rEndoA1, we found that these two proteins generated identical amounts of membrane tubules on liposomes (Fig.5B and 5C). By contrast, the KES1\_rEndoA1 chimera failed to produce abundant membrane tubules on liposomes carrying either 15%PS/85%PC or 25%PS/0.5%PIP2/74.5%PC (Fig.5B and 5C). The reduction in membrane tubulation by KES1\_rEndoA1 was likely due to changes of electrostatic sensing, rather than the membrane tubulation capability *per se*, because KES1\_rEndoA1 was able to robustly produce membrane tubules when membrane PIP2 was increased to 2% (Fig.5C). Together, these data show that KES1\_rEndoA1 requires a higher amount of negatively charged lipids to tubulate liposomes (PIP2 bears four negative charges whereas PS has one), raising a possibility that the net charge level of 0 of KES1 ALPS limits the potential of this motif to substitute endophilin H0.

### ***Increasing net positive charges of the KES1 ALPS motif improves its synaptic function.***

To define the relationship between the charge distribution and the functionality of amphipathic motifs, we engineered mutations to improve the function of the KES1\_rEndoA1 chimera *in vivo*. If the net charge level was indeed a limiting factor, we reasoned that introducing positive charges into the KES1 ALPS should improve its functionality. As a member of the ALPS family, the amphipathic motif of KES1 is rich in hydrophilic residues such as serine (S) and threonine (T). To add positive charges to the KES1 ALPS motif, we introduced mutations to convert hydrophilic S/T residues into positively charged lysine (K) residues. As shown in Fig.6A, we generated single K mutations to S2, S3, and S4, which are three residues in the first turn of the KES1 amphipathic helix. We found that these single mutations (S2K, S3K, or S4K) significantly improved the activity of KES1\_rEndoA1 to restore locomotion rates in *unc-57 endophilin* mutants (Fig.6B and 6C). Interestingly, S2K, S3K, or S4K mutations led to a similar level of locomotory improvement, suggesting that the position of these mutations had little or no impact on the functional changes of mutant KES1\_rEndoA1. Indeed, when we systematically introduced single K mutations to change each S/T site in the KES1 motif, we found that every single S/K mutant protein partially, but significantly, restored locomotion activity, and the locomotion rates were similar among the KES1\_rEndoA1 S/K mutant worms, regardless of the

position of the mutation (Fig.6C). These data suggest that the S/K mutations improved KES1\_rEndoA1 function by increasing the net positive charge rather than by altering specific charge locations.

Since single S/K mutations only partially restored the locomotion activity, we asked whether addition of a second K residue, bringing the net charge from +1 to +2, would further improve the activity of KES1\_rEndoA1 *in vivo*. Indeed, a combination of two single S/K mutations we tested (S4K and S20K, Fig.6C) showed significantly enhanced activity in restoring locomotion of *unc-57 endophilin* mutant worms, when compared to the single S4K and S20K mutants (Fig.6B and 6C). Next, we determined the impact of S4K,S20K KES1\_rEndoA1 at synapses using both functional and ultrastructural analyses. First, electrophysiological recordings showed that expression of S4K,S20K KES1\_rEndoA1 fully restored the amplitude of evoked EPSCs (Fig.6D), and the frequency of endogenous EPSCs (Fig.S5) in *unc-57 endophilin* mutants. Second, we found that VGLUT-pHluorin retrieval at synapses was fully recovered by expression of S4K,S20K KES1\_rEndoA1 in *unc-57 endophilin* mutants (Fig.6E). Third, electron microscopy results showed that the abundance of synaptic vesicles at S4K,S20K KES1\_rEndoA1 synapses was recovered to a level close to that in wild type synapses (Fig.6F and 6G). Further, the number of endosome-like structures was significantly reduced, when compared to synapses carrying KES1\_rEndoA1 (Fig.6H). Together, these findings demonstrate that increasing the net charge to +2 improved the activity of KES1\_rEndoA1 enough to substitute endophilin H0, and enabled mutant KES1\_rEndoA1 to efficiently support synaptic activities.

### ***The synaptic function of DivIVA\_rEndoA1 is improved by introducing positive net charges into its curvature-sensing motif.***

To determine how other amphipathic motifs respond to changes of net charge level, we investigated the sequence from DivIVA, a bacterial protein involved in cell division (Hempel et al., 2008; Lenarcic et al., 2009). The DivIVA amphipathic motif shares a couple of similar properties with the KES1 ALPS motif. First, expression of the DivIVA\_rEndoA1 chimeric protein failed to restore locomotion activity in

*unc-57 endophilin* mutant worms (Fig.2C and 2D). Second, the net charge level of the DivIVA amphipathic motif is 0 (Fig.7A), which is identical to that of KES1 ALPS. However, unlike KES1 ALPS, which lacks a significant amount of charged residues, the DivIVA amphipathic motif has 3 positive charges (from Lys and Arg) and 3 negative charges (from Asp and Glu), resulting in the net charge of 0 (Fig.7A). This unique electrostatic property allowed us to alter the net charge level in another way. Instead of using K residues, we introduced E4S, D12S, and E14S mutations into the DivIVA amphipathic motif to bring the net charge level to +3. We then systematically examined the *in vivo* function of the wild type (wt) and triple mutant (E4S,D12S,E14S) versions of DivIVA\_rEndoA1 chimeras using behavioral, electrophysiological, imaging, and ultrastructural analyses. In contrast to the failure of restoring locomotion by wt\_DivIVA\_rEndoA1, expression of the triple mutant E4S,D12S,E14S\_DivIVA\_rEndoA1 chimera in *unc-57* mutant worms fully restored locomotion (Fig.7B), endogenous EPSCs (Fig.7C), and evoked EPSCs (Fig.7D), as well as retrieval rates and basal levels of VGLUT-pHluorin (Fig.7E). Ultrastructural data showed that expression of the wt\_DivIVA\_rEndoA1 chimera in *unc-57* mutant animals failed to recover the synaptic vesicle abundance and led to the formation of abnormal endosome-like structures at synapses (Fig.7F, and 7G). In contrast with those results, at synapses carrying the E4S,D12S,E14S\_DivIVA\_rEndoA1 chimera, we found that the number of synaptic vesicles was returned to a normal level, and no endosome-like structures were observed (Fig.7F, and 7G). Together, these data present a second case where the function of endophilin chimeras could be improved *in vivo* by introducing positive net charges into a curvature-sensing motif.

### ***The net positive charge of the H0 motif is essential for the function of endophilin at synapses.***

Finally, we examined the electrostatic property of endophilin H0 and its role in supporting synaptic activity. The H0 motif of rEndoA1 has a net charge level of +4, with 5 positively charged Lys residues and 1 negatively charged Glu residue (Fig.8A). Alignment analysis showed that all Lys residues are highly conserved among orthologs of endophilin A1 across species (Fig.S3). To determine if conserved Lys residues are required, we introduced single K/S mutations to the rEndoA1 H0 motif

and expressed mutant versions of rEndoA1 in *unc-57 endophilin null* worms. Interestingly, single K/S mutations had little impact on the rescue activity of rEndoA1 in restoring locomotion rates (Fig.S6A), suggesting that individual lysine residues are not essential despite being highly conserved. However, these mutations showed a clear additive effect of disrupting the function of endophilin, as locomotion rates became lower when combinations of more K/S mutations were added (Fig.8B). To understand how K/S mutations alter the function of endophilin at synapses, we performed electrophysiological recordings to determine the levels of synaptic transmission. Like the locomotion results, we found that increases in the number of K/S mutations led to slower rates of endogenous EPSCs (Fig.8C), and lower amplitudes of evoked EPSCs (Fig.8D), without affecting the amplitudes of endogenous EPSCs (Fig.S6B). In particular, the introduction of 4 K/S mutations (K7S,K8S,K18S,K20S) completely abolished the ability of rEndoA1 to restore synaptic currents, indicating that positively charged Lys residues function as a collective group. Interestingly, our ultrastructural analysis showed that synapses carrying the 4 K/S mutant rEndoA1 had more endosome-like structures and fewer synaptic vesicles (Fig.8E-G), resembling features of KES1\_rEndoA1 synapses. Together, these results show that the net positive charge of the H0 motif is essential for the function of endophilin at synapses, further supporting the conclusion that the level of net charge contributes to the functional specificity of curvature-sensing motifs *in vivo*.

## Discussion

Our studies examined the functional specificity of amphipathic motifs *in vivo*. First, we demonstrated that endophilin H0 could be substituted by only a subset of curvature-sensing amphipathic motifs, highlighting the functional diversity among these amphipathic motifs in neurons. Second, we found that expression of the endophilin chimera carrying the KES1 ALPS motif failed to restore synaptic function and morphology, leading to an abnormal increase of endosome-like structures and a reduced pool of synaptic vesicles at synapses. Third, we improved the synaptic function of the KES1\_rEndoA1 chimera by increasing the net positive charges in the KES1 ALPS motif, demonstrating a sufficient role of electrostatic alterations in changing the functional specificity of amphipathic motifs. Fourth, we

showed that adjustment of cationic status of another curvature-sensitive motif from DivIVA led to similar improvement of the synaptic activity of the DivIVA\_rEndoA1 chimera, attesting to the importance of the electrostatic contribution to these two curvature-sensitive motifs from the unrelated proteins KES1 and DivIVA. Finally, we demonstrated the necessity of positive charges on the endophilin H0 motif *in vivo*. Thus, cationic property is both necessary, and sufficient, for providing curvature-sensing motifs with the functional specificity to replace endophilin H0 *in vivo*.

Amphipathic  $\alpha$ -helical motifs are often found in proteins that regulate the trafficking of membrane organelles. These motifs are thought to carry out specific activities for assisting their parental proteins in performing distinct cellular functions. In recent years, *in vitro* studies using synthetic membranes and molecular dynamics simulations have found a wealth of plausible mechanisms for interactions between amphipathic motifs and membranes. However, due to a lack of systematic analysis *in vivo*, understanding of these motifs largely remains as working models. This study used a protein engineering approach to identify factors that are sufficient to define the specificity of amphipathic motifs *in vivo*. Our findings led to several conclusions on mechanisms governing the specificity of endophilin H0 in living neurons.

(i) The function of the H0 motif does not require a specific protein sequence. Our studies found that unrelated amphipathic sequences are able to substitute endophilin H0 for synaptic function, therefore uncoupling the essential function of the H0 motif from specific protein-protein interactions (e.g., binding between endophilin H0 and SH3 domains (Chen *et al.*, 2014; Vazquez *et al.*, 2013; Wang *et al.*, 2008)). In addition, the linker between the H0 motif and the BAR domain of endophilin is flexible, and it tolerates insertion of amino acid residues, indicating that H0 has structural freedom from the rest of the protein.

(ii) The specificity of an amphipathic motif cannot be simply extrapolated from the function of its parental protein, and instead requires investigations that include functional studies. For instance, when grafted into endophilin, the amphipathic motif from the nuclear pore complex protein NUP133 (Doucet *et al.*, 2010; Lutzmann *et al.*, 2002; Nordeen *et al.*, 2020) can replace the endophilin H0 motif

in its role at synapses. Thus, amphipathic motifs could carry similar functions, even though their parental proteins may act on different membrane organelles.

(iii) Electrostatic contribution is necessary and sufficient for amphipathic motifs to support the activity of endophilin at synapses. Such an electrostatic contribution appears to be independent to the location of charges, or to particular types of amino acid residues. The overall status of net charges, rather than particular amino acid residues, modulates the activity of endophilin H0. Indeed, single Lys-to-Ser mutations in the endophilin H0 motif have little impact, but combinations of the Lys-to-Ser mutations disrupt endophilin's activity at synapses in an additive manner.

(iv) Endophilin H0 likely senses both curvature and electrostatic status of membranes. The amphipathic motifs of NUP133 and endophilin were previously categorized into two subgroups based on the type of residues in the polar face – the NUP133 amphipathic motif is a *bona fide* curvature sensor in the ALPS motif family (Drin and Antonny, 2010; Drin *et al.*, 2007) due to abundant polar serine and threonine residues, whereas endophilin H0 is thought to have low sensitivity to membrane curvature because it is rich in charged residues. In contrast to the anticipated distinction between two subgroups of amphipathic motifs, we find that NUP133 ALPS successfully replaced endophilin H0 *in vivo*. These results suggest that the functional boundary between ALPS motifs and endophilin H0 is not absolute. It is likely that NUP133\_ALPS and endophilin H0 play similar roles as dual sensors for membrane curvature and negatively charged lipids.

What is the contribution of positively charged residues in endophilin H0 to synaptic activity *in vivo*? Our results show that the cationic property of endophilin H0 has a strong impact on endosome-like structures, *i.e.*, the intermediate membrane organelles that support the endocytic reformation of synaptic vesicles (Clayton and Cousin, 2009; Hoopmann *et al.*, 2010; Kononenko and Haucke, 2015; Watanabe *et al.*, 2013a; Watanabe *et al.*, 2013b; Watanabe *et al.*, 2014). Recent studies show that, following the exocytosis of synaptic vesicles, endophilin acts at two distinct sites to recycle synaptic vesicle proteins and membranes. It promotes endocytic retrieval from the plasma membrane into endosomes (Kononenko *et al.*, 2014; Watanabe *et al.*, 2018), and then helps to resolve endosomes

into synaptic vesicles (Kittelmann *et al.*, 2013; Watanabe *et al.*, 2018). This two-step model suggests that complete removal of endophilin from synapses would block the initial endocytic retrieval, imposing a negative impact on the formation of endosomes. Consistent with this, our results show that the probability of finding endosome-like structures at *endophilin* mutant synapses is low (Fig.4), as high levels of VGLUT-pHluorin fluorescence indicated a failure of protein retrieval from the plasma membrane at *endophilin* mutant synapses (Fig.3F). By contrast, at synapses expressing endophilin chimeras with few positive charges (*e.g.*, KES1\_rEndoA1, DivIVA\_rEndoA1 and rEndoA1 with 4 K/S mutations), endosome-like structures become abundant and are much more frequently observed (Fig.4, Fig.7-E-H, and Fig.8E-G). Such endosomal changes are likely at the expense of synaptic vesicles, as there is a negative correlation between the size of endosome-like structures and the abundance of synaptic vesicles (Fig.4E). Collectively, our findings indicate that endophilin requires a strong net positive charge in the H0 motif to regulate endosomes and synaptic vesicles in neurons. Amphipathic motifs with sole activities in curvature-sensing (*e.g.*, KES1\_ALPS) are not sufficient for endophilin to reform synaptic vesicles from endosomes, which could lead to a ‘traffic jam’ causing abnormal accumulation of endosomes at synapses.

Results in this study provide *in vivo* evidence supporting a dual sensing capability of endophilin H0 to detect both curvature and electrostatic states of membranes. The cationic property of H0 is likely more important for the role of endophilin on endosomes than on the plasma membrane, because these membranes contain anionic lipids with distinct properties (Balla, 2013; Di Paolo and De Camilli, 2006). The plasma membrane is abundant with phosphatidylinositol 4,5-bisphosphates which bear a negative charge of  $\sim 4$ , whereas endosomes are enriched for phosphatidylinositol phosphates which have a negative charge of  $\sim 1.5$ . As a result, to recognize endosomal membranes, the endophilin H0 motif may require a high level of positive charges to reach sufficient electrostatic interactions. Future studies are needed to address this scenario in detail. Nonetheless, our studies demonstrate an electrostatic contribution for endophilin H0 to function *in vivo*. These results suggest a model in which

the H0 motif carries a dual sensing activity of membrane curvature and electrostatic status to ensure endophilin's action at distinct sites during synaptic vesicle endocytosis.

## Acknowledgments

This research was supported by NIH R01GM127857 and R01NS115974 to JB. The authors thank the *Caenorhabditis elegans* Genetics Center (funded by NIH Office of Research Infrastructure Programs P40 OD010440) and Dr. Cori Bargmann for worm strains. We thank Dr. Susan Parkhurst for critical reading of the manuscript. We thank the Cellular Imaging core at Fred Hutch for technical help with electron microscopy.

## Figure Legends

**Figure 1. The linker between the N-terminal amphipathic helix H0 and the BAR domain of Endophilin tolerates changes. (A)** *Upper panel* - Schematic diagram showing the domain structure of rat Endophilin A1 (rEndoA1). The amino acid sequence of the N-terminal amphipathic helix H0 (residues 1-21) is shown in brown, followed by an endogenous flexible linker (GGA) that connects endophilin H0 to the BAR domain. The blue arrow indicates insertions of amino acid residues after the endogenous linker. *Lower panel* – A helical wheel presentation of the rEndoA1\_H0 motif. Amino acid residues are colored as following; yellow, hydrophobic; blue, basic; red, acidic; purple, serine, threonine, asparagine, glutamine and histidine; grey, glycine; light yellow, alanine. **(B-D)** Mutant versions of rEndoA1 that carry insertions between endophilin H0 and the BAR domain were assayed for *in vivo* function. A pan-neuronal promoter *snb-1p* was used to drive transgene expression. Single-copy transgenes (*snb-1p::rEndoA1::gfp*) encoding GFP-tagged rEndoA1 variants were introduced into *endophilin unc-57(e406)* mutant worms. Representative trajectories (15 animals) of 30s locomotion for each genotype are shown in **(B)**. The starting points for each trajectory were aligned (indicated by red dots) for clarity. The scale bar indicates 1 mm. Electrophysiological recordings were used to determine endogenous and evoked excitatory postsynaptic currents (EPSCs) at neuromuscular junctions. Representative traces and summary data for endogenous EPSC rates and amplitudes were shown in **(C)**, and evoked EPSC traces and summary data were shown in **(D)**, for indicated genotypes. **\*\*\***,  $p < 0.001$ ; when compared to *endophilin unc-57 mutants*. The number of worms analyzed for each genotype is indicated in the bar graphs. Error bars represent standard error of the mean (SEM).

**Figure 2. Endophilin chimera carrying amphipathic helices from various proteins displayed functional specificity *in vivo*. (A)** Schematic diagram showing the domain structure of chimeric versions of rEndoA1 (tagged with GFP at C-terminus). The N-terminal H0 motif of rEndoA1 (colored in blue) was replaced by curvature-sensing amphipathic helices from various proteins. Helical wheel presentations of amphipathic helices used for generating endophilin chimera were shown in **(B)**. Amino acid residues were colored as described in the legend of Figure 1. Single-copy transgenes

(*snb-1p::rEndoA1\_chimera::gfp*) were introduced into *endophilin unc-57(e406)* mutant worms to drive expression of GFP-tagged rEndoA1 chimera in neurons. **(C)** Representative trajectories (15 animals) of 30s locomotion were shown for indicated genotype. The starting points for each trajectory were aligned (indicated by red dots) for clarity. The scale bar indicates 1 mm. **(D)** Summary data for locomotion rates were plotted for indicated genotypes. **(E)** Fluorescence microscopy was used to examine the distribution of rEndoA1 proteins at synapses and in axons. Representative images and summary data for wild type rEndoA1, mutant rEndoA1 lacking the H0 motif ( $\Delta$ H0), and chimeric rEndoA1 proteins carrying amphipathic curvature-sensing motifs from NUP133 and KES1 were shown. **\*\*\***,  $p < 0.001$ ; when compared to rEndoA1  $\Delta$ H0. The number of worms analyzed for each genotype is indicated in the bar graphs. Error bars represent SEM. Scale bars indicate 2  $\mu$ m.

**Figure 3. The KES1\_rEndoA1 chimera exhibited reduced activity in supporting synaptic transmission and recycling synaptic vesicle proteins.** Single-copy transgenes that encode GFP-tagged rEndoA1 chimera with KES1 and NUP133 amphipathic motifs (KES1\_rEndo and NUP133\_rEndo) were introduced into *endophilin unc-57(e406)* mutant worms. **(A-B)** Synaptic transmission was determined using electrophysiological recordings at neuromuscular junctions. Representative traces and summary data for endogenous EPSC frequency and amplitude were shown in **(A)**, and evoked EPSC (eEPSC) traces and summary data were shown in **(B)**. Schemes shown in **(C)** illustrate *in vivo* analysis of VGLUT-pHluorin fluorescence in *C. elegans* sensory neurons (ASH) upon sensory stimulation. VGLUT-pHluorin; a pH-sensitive super-ecliptic pHluorin reporter, was inserted into the first lumenal domain of the vesicular glutamate transporter VGLUT EAT-4 (Ventimiglia and Bargmann, 2017). Transgenic worms expressing VGLUT-pHluorin in the sensory ASH neuron were challenged for 10 seconds by 0.5M NaCl ("stimulus ON"). Exocytosis of synaptic vesicles triggered by NaCl stimulation delivers VGLUT-pHluorin to the plasma membrane, causing an increase in the pHluorin fluorescence in ASH neurons. After removal of NaCl stimuli ("stimulus OFF"), surface VGLUT-pHluorin was retrieved from the plasma membrane via endocytosis. Reacidification of synaptic vesicles quenches the pHluorin fluorescence. Representative images of VGLUT-pHluorin

that were acquired before, during, and after NaCl stimulation were shown in the insert. Scale bars indicate 2  $\mu$ m. Data plotted in **(D)** indicated mean VGLUT-pHluorin responses from wild type and *endophilin unc-57(e406)* mutant worms. Data plotted in **(E)** indicated mean VGLUT-pHluorin responses from transgenic *unc-57(e406)* mutant worms carrying KES1\_rEndo (*left*) and NUP133\_rEndo (*right*). Grey rectangles indicated “stimulation-on”. Shading indicated SEM. **(F)** Quantification of the recovery time constants (*left*) and the basal levels of VGLUT-pHluorin fluorescence (*right*). \*\*\*,  $p < 0.001$ ; when compared to *endophilin unc-57 mutants*. ###,  $p < 0.001$  and ##,  $p < 0.01$ ; when compared to KES1\_rEndo chimera. The number of synapses analyzed for each genotype is indicated in the bar graphs. Error bars indicate SEM.

**Figure 4. Synapses rescued by the KES1\_rEndo chimera have increased accumulation of abnormal endosome-like structures.** Single-copy transgenes that encode GFP-tagged KES1\_rEndoA1 chimera were introduced into *endophilin unc-57(e406)* mutant worms. **(A)** Representative transmission electron micrographs of synapses in the ventral nerve cords of adult hermaphrodites. Yellow shading indicates dense projections (DP). White arrow heads indicate endosome like structures (EL;  $>100$  nm in diameter). Scale bars indicate 100 nm. **(B)** Quantification of synaptic vesicles (SV;  $<50$  nm in diameter). The abundance of SVs per synaptic profile was shown as mean  $\pm$  standard error in the *left* panel. Error bars indicate SEM. The diameter of SVs was presented as box-whisker plots in the *right* panel. Whiskers indicate minimum and maximum values. **(C)** Quantification of large clear vesicles (LCV; 50-100 nm in diameter). The abundance of LCVs per synaptic profile was plotted as mean  $\pm$  standard error in the *left* panel. Error bars indicate SEM. The diameter of LCVs was presented as box-whisker plots in the *right* panel. Whiskers indicate minimum and maximum values. Data for SV and LCV abundance and size were collected from 40 wild type, 40 *unc-57* mutant, and 31 KES1\_rEndoA1 synaptic profiles. **(D)** Endosome-like structures (EL;  $>100$  nm in diameter). The number of ELs per synapse was presented as mean  $\pm$  standard error (*left*). Error bars indicate SEM. \*\*\*,  $p < 0.001$ ; \*\*,  $p < 0.01$ ; n.s., not significant; one-way ANOVA followed by Dunnett's test. The fraction of synapses with and without endosome-like structures was calculated

and plotted for each genotype (*right*). Data for endosome-like structures were collected from 24 wild type synapses, 25 *unc-57* mutant synapses, and 18 KES1\_rEndoA1 synapses. **(E)** A scatter plot illustrated the negative relationship between the size of endosome-like structures and the abundance of synaptic vesicles. The y-axis value of each dot indicates the sum of maximum cross-sectional areas of endosome-like structures in a synapse. The corresponding x-axis value indicates the mean number of SVs per synaptic profile of the same synapse where the y-value was determined. Data obtained from KES1\_rEndo synapses were colored in blue. The grey dot indicates data from wild type synapses (the mean number of synaptic vesicles per profile and the lack of endosome-like structures). The purple line indicated the best fit of simple linear regression.  $R^2 = 0.34$  and  $* p < 0.05$ . Statistical analysis and graphing were carried out using Prism 9 (GraphPad).

**Figure 5. Chimeric endophilin proteins carrying KES1 and NUP133 amphipathic helices display distinct properties.** **(A)** Helical wheel presentations (top) and sequences (bottom) of amphipathic helices in KES1, NUP133, and rEndoA1. ALPS: amphipathic lipid packing sensor motif. Net electric charges of these amphipathic helices were shown (middle). Amino acid residues in the helical wheel presentations are colored as described in the legend of Figure 1. **(B)** Transmission electron micrographs for liposomes incubated with wild type and chimeric rEndoA1 proteins; (*left*) wild type rEndoA1, (*middle*) KES1\_rEndoA1, and (*right*) NUP133\_rEndoA1. Liposomes were prepared by extrusion through filters with 0.2  $\mu$ m pore size. The lipid composition of these liposomes was 25%PS/0.5%PIP2/74.5%PC. Wild type and chimeric rEndoA1 proteins (4 $\mu$ M) were incubated with liposomes (2 mM total lipids) for 5 min at the room temperature. Reaction was stopped by fixing with 0.5x Karnovsky's solution. Scale bars: 200 nm. **(C)** Quantification of membrane tubulation. Tubulation Fraction = (# of liposomes with extended protrusions) / (# of total liposomes). Liposomes contained either 15%PS/85%PC, 25%PS/0.5%PIP2/74.5%PC, or 25%PS/2%PIP2/73%PC, respectively. Error bars indicate SEM. \*\*\*,  $p < 0.001$ , compared to liposomes incubated with wild type rEndoA1. One-way ANOVA followed by Dunnett's test was used for statistical analysis.

**Figure 6. Serine to Lysine mutations improved the function of KES1\_rEndoA1 chimera *in vivo*.**

A helical wheel presentation of the ALPS motif of KES1 was shown in **(A)**. Arrows indicated the serine residues (S2, S3, and S4) that occupy the 1<sup>st</sup> turn of the amphipathic helix, and S20 that resides on the opposite side to S4. The full sequence of the ALPS motif of KES1 was listed below the helical wheel. **(B)** Representative trajectories (15 animals) of 30s locomotion were shown for transgenic *endophilin unc-57* mutant worms carrying various KES1\_rEndoA1 chimeras as indicated. Locomotion traces of *endophilin unc-57* mutant worms were shown as controls. The scale bar indicates 1 mm. **(C)** Quantification of locomotion rates. Mutant KES1\_rEndoA1 chimeras with serine-to-lysine (S/K) mutations were examined for their ability to restore locomotion activity in *endophilin unc-57* mutant worms. The number of worms analyzed for each genotype is shown in the bar graphs. Error bars represent SEM. **(D)** Representative eEPSC (evoked EPSC) traces and summary data for eEPSC amplitudes were shown for indicated genotypes. \*\*\*,  $p < 0.001$ ; when compared to *endophilin unc-57* mutants. ###,  $p < 0.001$ ; and #,  $p < 0.05$ ; when compared to animals rescued by S4K,S20K mutant KES1\_rEndoA1. The number of worms analyzed for each genotype is indicated in the bar graphs. Error bars indicate SEM. One-way ANOVA followed by Dunnett's test was used for statistical analysis. Data plotted in **(E)** showed VGLUT-pHluorin responses from worms of indicated genotypes - *(left)* a time course of mean fluorescence responses in ASH neurons carrying S4K,S20K KES1\_rEndoA1, *(middle)* rate constants of fluorescence decay; and *(right)* basal levels of VGLUT-pHluorin fluorescence. Grey rectangles indicated “stimulation-on”. Shading indicated SEM. Error bars in the middle and right panels indicated SEM. The number of synapses analyzed for each genotype was indicated in the bar graphs. **(F)** A representative transmission electron micrograph of synapses rescued by the S4K,S20K KES1\_rEndoA1. **(G)** The abundance of SVs per synaptic profile was shown as mean  $\pm$  standard error. Data for SV abundance were collected from 40 wild type, 40 *unc-57* mutant, 31 KES1\_rEndoA1 and 20 S4K,S20K KES1\_rEndoA1 synaptic profiles. Error bars indicated SEM. **(H)** The number of endosome-like (EL) structures per synapse was presented as mean  $\pm$  SEM. Data for endosome-like structures were collected from 24 wild type synapses, 25 *unc-57* mutant synapses, 18

635 KES1\_rEndoA1 synapses, and 15 S4K,S20K\_KES1\_rEndoA1 synapses. \*\*\*,  $p < 0.001$ ; \*\*,  $p < 0.01$ ;  
636 n.s., not significant; one-way ANOVA followed by Dunnett's test.

637

638 **Figure 7. Increases of positive net charges of the amphipathic helix improved the function of**  
639 **DivIVA\_rEndoA1 chimeras.** A helical wheel presentation of an ALPS motif of the bacteria protein  
640 DivIVA was shown in **(A)**. Two glutamic acid residues (E4, E14) and an aspartic acid residue (D12)  
641 were changed to serine residues to generate the E4S,D12S,E14S version of DivIVA\_rEndoA1. Data  
642 from locomotion studies **(B)**, electrophysiological recordings of endogenous EPSCs **(C)** and evoked  
643 EPSCs **(D)**, and fluorescence analysis of ASH VGLUT-pHluorin fluorescence responses to sensory  
644 stimuli **(E)**, were quantified. These results were plotted as described in the legends of Figures 3 and 6.  
645 Error bars represented SEM. The number of synapses analyzed for each genotype is indicated in the  
646 bar graphs. **(F)** Representative transmission electron micrographs of synapses rescued by  
647 DivIVA\_rEndoA1 and the mutant E4S,D12S,E14S DivIVA\_rEndoA1 were shown as indicated. Yellow  
648 shading indicated dense projections (DP). The white arrowheads show endosome-like structures. **(G)**  
649 The abundance of synaptic vesicles per synaptic profile was shown as mean  $\pm$  SEM. Data for  
650 synaptic vesicle abundance were collected from 40 wild type, 40 *unc-57* mutant, 28 DivIVA\_rEndoA1  
651 and 18 E4S,D12S,E14S\_DivIVA\_rEndoA1 synaptic profiles. **(H)** The number of endosome-like (EL)  
652 structures per synapse was presented as mean  $\pm$  standard error. Data for endosome-like structures  
653 were collected from 24 wild type, 25 *unc-57* mutant, 28 DivIVA\_rEndoA1 and 18  
654 E4S,D12S,E14S\_DivIVA\_rEndoA1 synapses. \*\*\*,  $p < 0.001$ ; one-way ANOVA followed by Dunnett's  
655 test.

656

657 **Figure 8. Lysine-to-serine mutations disrupted the function of Endophilin and induced**  
658 **accumulation of endosome-like structures at synapses.** **(A)** Lysine residues were highlighted in  
659 the sequence (top) and the helical wheel presentation (middle) of the H0 motif of rEndoA1. The net  
660 charge (+4) of rEndoA1 H0 was indicated (bottom) for clarity. Single-copy transgenes that encode  
661 GFP-tagged rEndoA1 were introduced into *endophilin unc-57(e406)* mutant worms. Four versions of

662 lysine-to-serine (K-to-S) mutant rEndoA1 (including the single K16S, the double K7S,K16S, the triple  
663 K7S,K16S,K20S, and the quadruple K7S,K8S,K16S,K20S mutants) were examined for their ability to  
664 restore locomotion **(B)**, endogenous EPSCs **(C)**, and evoked EPSCs **(D)**. Error bars represent SEM.  
665 The number of worms analyzed for each genotype is indicated in the bar graphs. **(E)** Representative  
666 transmission electron micrograph of synapses rescued by the K7S,K8S,K16S,K20S quadruple mutant  
667 rEndoA1. Yellow shading indicated dense projections (DP). White arrowheads showed endosome-like  
668 structures. **(F)** The abundance of synaptic vesicles per synaptic profile was shown as mean  $\pm$   
669 standard error. Data for SVs were collected from 40 wild type, 40 *unc-57* mutant, and 29  
670 K7S,K8S,K16S,K20S mutant synaptic profiles. \*\*,  $p < 0.01$ ; *n.s.*, not significant; compared to the  
671 quadruple K7S,K8S,K16S,K20S mutants, one-way ANOVA followed by Dunnett's test. **(G)**  
672 Quantification of endosome-like (EL) structures were shown. The number of ELs per synapse was  
673 presented as mean  $\pm$  standard error (*left*). Error bars indicate SEM. \*\*\*,  $p < 0.001$ ; one-way ANOVA  
674 followed by Dunnett's test. The fraction of synapses with and without endosome-like structures was  
675 plotted for each genotype (*right*). Data for endosome-like structures were collected from 24 wild type  
676 synapses, 25 *unc-57* mutant synapses, and 24 K7S,K8S,K16S,K20S mutant rEndoA1 synapses.

# References

- Ambroso, M.R., Hegde, B.G., and Langen, R. (2014). Endophilin A1 induces different membrane shapes using a conformational switch that is regulated by phosphorylation. *Proc Natl Acad Sci U S A* 111, 6982-6987. 10.1073/pnas.1402233111.
- Antonny, B. (2011). Mechanisms of membrane curvature sensing. *Annu Rev Biochem* 80, 101-123. 10.1146/annurev-biochem-052809-155121.
- Bai, J.H., Hu, Z.T., Dittman, J.S., Pym, E.C.G., and Kaplan, J.M. (2010). Endophilin Functions as a Membrane-Bending Molecule and Is Delivered to Endocytic Zones by Exocytosis. *Cell* 143, 430-441. 10.1016/j.cell.2010.09.024.
- Balla, T. (2013). Phosphoinositides: tiny lipids with giant impact on cell regulation. *Physiol Rev* 93, 1019-1137. 10.1152/physrev.00028.2012.
- Bartels, T., Ahlstrom, L.S., Leftin, A., Kamp, F., Haass, C., Brown, M.F., and Beyer, K. (2010). The N-terminus of the intrinsically disordered protein alpha-synuclein triggers membrane binding and helix folding. *Biophys J* 99, 2116-2124. 10.1016/j.bpj.2010.06.035.
- Bhatia, V.K., Madsen, K.L., Bolinger, P.Y., Kunding, A., Hedegard, P., Gether, U., and Stamou, D. (2009). Amphipathic motifs in BAR domains are essential for membrane curvature sensing. *Embo J* 28, 3303-3314. 10.1038/emboj.2009.261.
- Bigay, J., and Antonny, B. (2012). Curvature, lipid packing, and electrostatics of membrane organelles: defining cellular territories in determining specificity. *Dev Cell* 23, 886-895. 10.1016/j.devcel.2012.10.009.
- Bigay, J., Casella, J.F., Drin, G., Mesmin, B., and Antonny, B. (2005). ArfGAP1 responds to membrane curvature through the folding of a lipid packing sensor motif. *Embo J* 24, 2244-2253. 10.1038/sj.emboj.7600714.
- Blood, P.D., Swenson, R.D., and Voth, G.A. (2008). Factors influencing local membrane curvature induction by N-BAR domains as revealed by molecular dynamics simulations. *Biophys J* 95, 1866-1876. 10.1529/biophysj.107.121160.

703 Boucrot, E., Ferreira, A.P.A., Almeida-Souza, L., Debard, S., Vallis, Y., Howard, G., Bertot, L.,  
704 Sauvonnnet, N., and McMahon, H.T. (2015). Endophilin marks and controls a clathrin-independent  
705 endocytic pathway. *Nature* 517, 460-+. 10.1038/nature14067.

706 Boucrot, E., Pick, A., Camdere, G., Liska, N., Evergren, E., McMahon, H.T., and Kozlov, M.M. (2012).  
707 Membrane fission is promoted by insertion of amphipathic helices and is restricted by crescent  
708 BAR domains. *Cell* 149, 124-136. 10.1016/j.cell.2012.01.047.

709 Braun, A.R., Lacy, M.M., Ducas, V.C., Rhoades, E., and Sachs, J.N. (2017). alpha-Synuclein's  
710 Uniquely Long Amphipathic Helix Enhances its Membrane Binding and Remodeling Capacity. *J*  
711 *Membr Biol* 250, 183-193. 10.1007/s00232-017-9946-1.

712 Burbea, M., Dreier, L., Dittman, J.S., Grunwald, M.E., and Kaplan, J.M. (2002). Ubiquitin and AP180  
713 regulate the abundance of GLR-1 glutamate receptors at postsynaptic elements in *C. elegans*.  
714 *Neuron* 35, 107-120. 10.1016/s0896-6273(02)00749-3.

715 Campelo, F., McMahon, H.T., and Kozlov, M.M. (2008). The hydrophobic insertion mechanism of  
716 membrane curvature generation by proteins. *Biophys J* 95, 2325-2339.  
717 10.1529/biophysj.108.133173.

718 Capraro, B.R., Shi, Z., Wu, T.T., Chen, Z.M., Dunn, J.M., Rhoades, E., and Baumgart, T. (2013).  
719 Kinetics of Endophilin N-BAR Domain Dimerization and Membrane Interactions. *J Biol Chem* 288,  
720 12533-12543. 10.1074/jbc.M112.435511.

721 Chen, Z., Atefi, E., and Baumgart, T. (2016a). Membrane Shape Instability Induced by Protein  
722 Crowding. *Biophys J* 111, 1823-1826. 10.1016/j.bpj.2016.09.039.

723 Chen, Z., Chang, K., Capraro, B.R., Zhu, C., Hsu, C.J., and Baumgart, T. (2014).  
724 Intradimer/Intermolecular interactions suggest autoinhibition mechanism in endophilin A1. *J Am*  
725 *Chem Soc* 136, 4557-4564. 10.1021/ja411607b.

726 Chen, Z., Zhu, C., Kuo, C.J., Robustelli, J., and Baumgart, T. (2016b). The N-Terminal Amphipathic  
727 Helix of Endophilin Does Not Contribute to Its Molecular Curvature Generation Capacity. *Journal*  
728 *of the American Chemical Society* 138, 14616-14622. 10.1021/jacs.6b06820.

729 Chronis, N., Zimmer, M., and Bargmann, C.I. (2007). Microfluidics for in vivo imaging of neuronal and  
730 behavioral activity in *Caenorhabditis elegans*. *Nat Methods* 4, 727-731. 10.1038/nmeth1075.

731 Clayton, E.L., and Cousin, M.A. (2009). The molecular physiology of activity-dependent bulk  
732 endocytosis of synaptic vesicles. *J Neurochem* 111, 901-914. 10.1111/j.1471-4159.2009.06384.x.

733 Copic, A., Antoine-Bally, S., Gimenez-Andres, M., La Torre Garay, C., Antonny, B., Manni, M.M.,  
734 Pagnotta, S., Guihot, J., and Jackson, C.L. (2018). A giant amphipathic helix from a perilipin that is  
735 adapted for coating lipid droplets. *Nat Commun* 9, 1332. 10.1038/s41467-018-03717-8.

736 Cornell, R.B., and Taneva, S.G. (2006). Amphipathic helices as mediators of the membrane  
737 interaction of amphitropic proteins, and as modulators of bilayer physical properties. *Curr Protein*  
738 *Pept Sci* 7, 539-552. 10.2174/138920306779025675.

739 Cui, H., Lyman, E., and Voth, G.A. (2011). Mechanism of membrane curvature sensing by  
740 amphipathic helix containing proteins. *Biophys J* 100, 1271-1279. 10.1016/j.bpj.2011.01.036.

741 Cui, H., Mim, C., Vazquez, F.X., Lyman, E., Unger, V.M., and Voth, G.A. (2013). Understanding the  
742 role of amphipathic helices in N-BAR domain driven membrane remodeling. *Biophys J* 104, 404-  
743 411. 10.1016/j.bpj.2012.12.006.

744 Davidson, W.S., Jonas, A., Clayton, D.F., and George, J.M. (1998). Stabilization of alpha-synuclein  
745 secondary structure upon binding to synthetic membranes. *J Biol Chem* 273, 9443-9449. DOI  
746 10.1074/jbc.273.16.9443.

747 Di Paolo, G., and De Camilli, P. (2006). Phosphoinositides in cell regulation and membrane dynamics.  
748 *Nature* 443, 651-657. 10.1038/nature05185.

749 Dickman, D.K., Horne, J.A., Meinertzhagen, I.A., and Schwarz, T.L. (2005). A slowed classical  
750 pathway rather than kiss-and-run mediates endocytosis at synapses lacking synaptojanin and  
751 endophilin. *Cell* 123, 521-533. 10.1016/j.cell.2005.09.026.

752 Dittman, J.S., and Kaplan, J.M. (2006). Factors regulating the abundance and localization of  
753 synaptobrevin in the plasma membrane. *Proc Natl Acad Sci U S A* 103, 11399-11404.  
754 10.1073/pnas.0600784103.

755 Dong, Y.M., Gou, Y.Y., Li, Y., Liu, Y., and Bai, J.H. (2015). Synaptojanin cooperates in vivo with  
756 endophilin through an unexpected mechanism. *Elife* 4. ARTN e05660  
757 10.7554/eLife.05660.

758 Doucet, C.M., Esmerly, N., de Saint-Jean, M., and Antonny, B. (2015). Membrane Curvature Sensing  
759 by Amphipathic Helices Is Modulated by the Surrounding Protein Backbone. *PLoS One* 10,  
760 e0137965. 10.1371/journal.pone.0137965.

761 Doucet, C.M., Talamas, J.A., and Hetzer, M.W. (2010). Cell cycle-dependent differences in nuclear  
762 pore complex assembly in metazoa. *Cell* 141, 1030-1041. 10.1016/j.cell.2010.04.036.

763 Drin, G., and Antonny, B. (2010). Amphipathic helices and membrane curvature. *FEBS Lett* 584,  
764 1840-1847. 10.1016/j.febslet.2009.10.022.

765 Drin, G., Casella, J.F., Gautier, R., Boehmer, T., Schwartz, T.U., and Antonny, B. (2007). A general  
766 amphipathic alpha-helical motif for sensing membrane curvature. *Nature Structural & Molecular*  
767 *Biology* 14, 138-146. 10.1038/nsmb1194.

768 Farsad, K., Ringstad, N., Takei, K., Floyd, S.R., Rose, K., and De Camilli, P. (2001). Generation of  
769 high curvature membranes mediated by direct endophilin bilayer interactions. *Journal of Cell*  
770 *Biology* 155, 193-200. DOI 10.1083/jcb.200107075.

771 Ferreira, A.P.A., and Boucrot, E. (2018). Mechanisms of Carrier Formation during Clathrin-  
772 Independent Endocytosis. *Trends Cell Biol* 28, 188-200. 10.1016/j.tcb.2017.11.004.

773 Ford, M.G.J., Mills, I.G., Peter, B.J., Vallis, Y., Praefcke, G.J.K., Evans, P.R., and McMahon, H.T.  
774 (2002). Curvature of clathrin-coated pits driven by epsin. *Nature* 419, 361-366.  
775 10.1038/nature01020.

776 Frokjaer-Jensen, C., Davis, M.W., Ailion, M., and Jorgensen, E.M. (2012). Improved Mos1-mediated  
777 transgenesis in *C. elegans*. *Nat Methods* 9, 117-118. 10.1038/nmeth.1865.

778 Frokjaer-Jensen, C., Davis, M.W., Hopkins, C.E., Newman, B.J., Thummel, J.M., Olesen, S.P.,  
779 Grunnet, M., and Jorgensen, E.M. (2008). Single-copy insertion of transgenes in *Caenorhabditis*  
780 *elegans*. *Nat Genet* 40, 1375-1383. 10.1038/ng.248.

781 Galic, M., Jeong, S., Tsai, F.C., Joubert, L.M., Wu, Y.I., Hahn, K.M., Cui, Y., and Meyer, T. (2012).  
782 External push and internal pull forces recruit curvature-sensing N-BAR domain proteins to the  
783 plasma membrane. *Nat Cell Biol* 14, 874-881. 10.1038/ncb2533.

784 Gallop, J.L., Jao, C.C., Kent, H.M., Butler, P.J.G., Evans, P.R., Langen, R., and T McMahon, H.  
785 (2006). Mechanism of endophilin N-BAR domain-mediated membrane curvature. *Embo J* 25,  
786 2898-2910. 10.1038/sj.emboj.7601174.

787 Georgieva, E.R., Ramlall, T.F., Borbat, P.P., Freed, J.H., and Eliezer, D. (2008). Membrane-bound  
788 alpha-synuclein forms an extended helix: long-distance pulsed ESR measurements using vesicles,  
789 bicelles, and rodlike micelles. *J Am Chem Soc* 130, 12856-12857. 10.1021/ja804517m.

790 Gibson, D.G., Young, L., Chuang, R.Y., Venter, J.C., Hutchison, C.A., 3rd, and Smith, H.O. (2009).  
791 Enzymatic assembly of DNA molecules up to several hundred kilobases. *Nat Methods* 6, 343-345.  
792 10.1038/nmeth.1318.

793 Gimenez-Andres, M., Copic, A., and Antonny, B. (2018). The Many Faces of Amphipathic Helices.  
794 *Biomolecules* 8. 10.3390/biom8030045.

795 Goldberg, J. (1998). Structural basis for activation of ARF GTPase: mechanisms of guanine  
796 nucleotide exchange and GTP-myristoyl switching. *Cell* 95, 237-248. 10.1016/s0092-  
797 8674(00)81754-7.

798 Gonzalez-Rubio, P., Gautier, R., Etchebest, C., and Fuchs, P.F. (2011). Amphipathic-Lipid-Packing-  
799 Sensor interactions with lipids assessed by atomistic molecular dynamics. *Biochim Biophys Acta*  
800 1808, 2119-2127. 10.1016/j.bbamem.2011.05.006.

801 Hatzakis, N.S., Bhatia, V.K., Larsen, J., Madsen, K.L., Bolinger, P.Y., Kunding, A.H., Castillo, J.,  
802 Gether, U., Hedegard, P., and Stamou, D. (2009). How curved membranes recruit amphipathic  
803 helices and protein anchoring motifs. *Nat Chem Biol* 5, 835-841. 10.1038/nchembio.213.

804 Hempel, A.M., Wang, S.B., Letek, M., Gil, J.A., and Flardh, K. (2008). Assemblies of DivIVA mark  
805 sites for hyphal branching and can establish new zones of cell wall growth in *Streptomyces*  
806 *coelicolor*. *J Bacteriol* 190, 7579-7583. 10.1128/JB.00839-08.

807 Higuchi, R., Krummel, B., and Saiki, R.K. (1988). A general method of in vitro preparation and specific  
808 mutagenesis of DNA fragments: study of protein and DNA interactions. *Nucleic Acids Res* 16,  
809 7351-7367. 10.1093/nar/16.15.7351.

810 Hoopmann, P., Punge, A., Barysch, S.V., Westphal, V., Buckers, J., Opazo, F., Bethani, I.,  
811 Lauterbach, M.A., Hell, S.W., and Rizzoli, S.O. (2010). Endosomal sorting of readily releasable  
812 synaptic vesicles. *Proc Natl Acad Sci U S A* 107, 19055-19060. 10.1073/pnas.1007037107.

813 Hristova, K., Wimley, W.C., Mishra, V.K., Anantharamiah, G.M., Segrest, J.P., and White, S.H. (1999).  
814 An amphipathic alpha-helix at a membrane interface: A structural study using a novel X-ray  
815 diffraction method. *J Mol Biol* 290, 99-117. DOI 10.1006/jmbi.1999.2840.

816 Im, Y.J., Raychaudhuri, S., Prinz, W.A., and Hurley, J.H. (2005). Structural mechanism for sterol  
817 sensing and transport by OSBP-related proteins. *Nature* 437, 154-158. 10.1038/nature03923.

818 Jao, C.C., Der-Sarkissian, A., Chen, J., and Langen, R. (2004). Structure of membrane-bound  $\alpha$ -  
819 synuclein studied by site-directed spin labeling. *Proceedings of the National Academy of Sciences*  
820 *of the United States of America* 101, 8331. 10.1073/pnas.0400553101.

821 Jao, C.C., Hegde, B.G., Chen, J., Haworth, I.S., and Langen, R. (2008). Structure of membrane-  
822 bound alpha-synuclein from site-directed spin labeling and computational refinement. *Proc Natl*  
823 *Acad Sci U S A* 105, 19666-19671. 10.1073/pnas.0807826105.

824 Jao, C.C., Hegde, B.G., Gallop, J.L., Hegde, P.B., McMahon, H.T., Haworth, I.S., and Langen, R.  
825 (2010). Roles of amphipathic helices and the bin/amphiphysin/rvs (BAR) domain of endophilin in  
826 membrane curvature generation. *J Biol Chem* 285, 20164-20170. 10.1074/jbc.M110.127811.

827 Jarsch, I.K., Daste, F., and Gallop, J.L. (2016). Membrane curvature in cell biology: An integration of  
828 molecular mechanisms. *J Cell Biol* 214, 375-387. 10.1083/jcb.201604003.

829 Kaiser, E.T., and Kezdy, F.J. (1983). Secondary structures of proteins and peptides in amphiphilic  
830 environments. (A review). *Proc Natl Acad Sci U S A* 80, 1137-1143. 10.1073/pnas.80.4.1137.

831 Kaiser, E.T., and Kezdy, F.J. (1984). Amphiphilic secondary structure: design of peptide hormones.  
832 *Science* 223, 249-255. 10.1126/science.6322295.

833 Kaneko, T., Maeda, A., Takefuji, M., Aoyama, H., Nakayama, M., Kawabata, S., Kawano, Y.,  
834 Iwamatsu, A., Amano, M., and Kaibuchi, K. (2005). Rho mediates endocytosis of epidermal growth  
835 factor receptor through phosphorylation of endophilin A1 by Rho-kinase. *Genes Cells* 10, 973-987.  
836 10.1111/j.1365-2443.2005.00895.x.

837 Karanasios, E., Han, G.S., Xu, Z., Carman, G.M., and Siniosoglou, S. (2010). A phosphorylation-  
838 regulated amphipathic helix controls the membrane translocation and function of the yeast  
839 phosphatidate phosphatase. *Proc Natl Acad Sci U S A* 107, 17539-17544.  
840 10.1073/pnas.1007974107.

841 Kittelmann, M., Liewald, J.F., Hegermann, J., Schultheis, C., Brauner, M., Steuer Costa, W., Wabnig,  
842 S., Eimer, S., and Gottschalk, A. (2013). In vivo synaptic recovery following optogenetic  
843 hyperstimulation. *Proc Natl Acad Sci U S A* 110, E3007-3016. 10.1073/pnas.1305679110.

844 Kononenko, N.L., and Haucke, V. (2015). Molecular mechanisms of presynaptic membrane retrieval  
845 and synaptic vesicle reformation. *Neuron* 85, 484-496. 10.1016/j.neuron.2014.12.016.

846 Kononenko, Natalia L., Puchkov, D., Classen, Gala A., Walter, Alexander M., Pechstein, A., Sawade,  
847 L., Kaempfer, N., Trimbuch, T., Lorenz, D., Rosenmund, C., et al. (2014). Clathrin/AP-2 Mediate  
848 Synaptic Vesicle Reformation from Endosome-like Vacuoles but Are Not Essential for Membrane  
849 Retrieval at Central Synapses. *Neuron* 82, 981-988. <https://doi.org/10.1016/j.neuron.2014.05.007>.

850 Krauss, M., Jia, J.Y., Roux, A., Beck, R., Wieland, F.T., De Camilli, P., and Haucke, V. (2008). Arf1-  
851 GTP-induced tubule formation suggests a function of Arf family proteins in curvature acquisition at  
852 sites of vesicle budding. *J Biol Chem* 283, 27717-27723. 10.1074/jbc.M804528200.

853 Kroll, J., Tobon, L.M.J., Vogl, C., Neef, J., Kondratiuk, I., König, M., Strenzke, N., Wichmann, C.,  
854 Milosevic, I., and Moser, T. (2019). Endophilin-A regulates presynaptic Ca<sup>2+</sup> influx and synaptic  
855 vesicle recycling in auditory hair cells. *Embo J* 38. ARTN e100116  
856 10.15252/embj.2018100116.

857 Lee, M.C., Orci, L., Hamamoto, S., Futai, E., Ravazzola, M., and Schekman, R. (2005). Sar1p N-  
858 terminal helix initiates membrane curvature and completes the fission of a COPII vesicle. *Cell* 122,  
859 605-617. 10.1016/j.cell.2005.07.025.

860 Lenarcic, R., Halbedel, S., Visser, L., Shaw, M., Wu, L.J., Errington, J., Marenduzzo, D., and Hamoen,  
861 L.W. (2009). Localisation of DivIVA by targeting to negatively curved membranes. *Embo J* 28,  
862 2272-2282. 10.1038/emboj.2009.129.

863 Low, C., Weininger, U., Lee, H., Schweimer, K., Neundorff, I., Beck-Sickinger, A.G., Pastor, R.W., and  
864 Balbach, J. (2008). Structure and dynamics of helix-0 of the N-BAR domain in lipid micelles and  
865 bilayers. *Biophys J* 95, 4315-4323. 10.1529/biophysj.108.134155.

866 Lutzmann, M., Kunze, R., Buerer, A., Aebi, U., and Hurt, E. (2002). Modular self-assembly of a Y-  
867 shaped multiprotein complex from seven nucleoporins. *Embo J* 21, 387-397.  
868 10.1093/emboj/21.3.387.

869 Masuda, M., Takeda, S., Sone, M., Ohki, T., Mori, H., Kamioka, Y., and Mochizuki, N. (2006).  
870 Endophilin BAR domain drives membrane curvature by two newly identified structure-based  
871 mechanisms. *Embo J* 25, 2889-2897. 10.1038/sj.emboj.7601176.

872 McLean, L.R., Hagaman, K.A., Owen, T.J., and Krstenansky, J.L. (1991). Minimal peptide length for  
873 interaction of amphipathic alpha-helical peptides with phosphatidylcholine liposomes. *Biochemistry*  
874 30, 31-37. 10.1021/bi00215a005.

875 McMahon, H.T., and Gallop, J.L. (2005). Membrane curvature and mechanisms of dynamic cell  
876 membrane remodelling. *Nature* 438, 590-596. 10.1038/nature04396.

877 Milosevic, I., Giovedi, S., Lou, X.L., Raimondi, A., Collesi, C., Shen, H.Y., Paradise, S., O'Toole, E.,  
878 Ferguson, S., Cremona, O., and De Camilli, P. (2011). Recruitment of Endophilin to Clathrin-  
879 Coated Pit Necks Is Required for Efficient Vesicle Uncoating after Fission. *Neuron* 72, 587-601.  
880 10.1016/j.neuron.2011.08.029.

881 Moser von Filseck, J., Vanni, S., Mesmin, B., Antonny, B., and Drin, G. (2015). A phosphatidylinositol-  
882 4-phosphate powered exchange mechanism to create a lipid gradient between membranes. *Nat*  
883 *Commun* 6, 6671. 10.1038/ncomms7671.

884 Nordeen, S.A., Turman, D.L., and Schwartz, T.U. (2020). Yeast Nup84-Nup133 complex structure  
885 details flexibility and reveals conservation of the membrane anchoring ALPS motif. *Nat Commun*  
886 11, 6060. 10.1038/s41467-020-19885-5.

887 Peter, B.J., Kent, H.M., Mills, I.G., Vallis, Y., Butler, P.J., Evans, P.R., and McMahon, H.T. (2004).  
888 BAR domains as sensors of membrane curvature: the amphiphysin BAR structure. *Science* 303,  
889 495-499. 10.1126/science.1092586.

890 Poudel, K.R., Dong, Y.M., Yu, H., Su, A., Ho, T., Liu, Y., Schulten, K., and Bai, J.H. (2016). A time  
891 course of orchestrated endophilin action in sensing, bending, and stabilizing curved membranes.  
892 *Mol Biol Cell* 27, 2119-2132. 10.1091/mbc.E16-04-0264.

893 Poudel, K.R., Roh-Johnson, M., Su, A., Ho, T., Mathsaraja, H., Anderson, S., Grady, W.M., Moens,  
894 C.B., Conacci-Sorrell, M., Eisenman, R.N., and Bai, J. (2018). Competition between TIAM1 and  
895 Membranes Balances Endophilin A3 Activity in Cancer Metastasis. *Dev Cell* 45, 738-752 e736.  
896 10.1016/j.devcel.2018.05.021.

897 Prinz, W.A., and Hinshaw, J.E. (2009). Membrane-bending proteins. *Crit Rev Biochem Mol Biol* 44,  
898 278-291. 10.1080/10409230903183472.

899 Renard, H.F., Simunovic, M., Lemiere, J., Boucrot, E., Garcia-Castillo, M.D., Arumugam, S.,  
900 Chambon, V., Lamaze, C., Wunder, C., Kenworthy, A.K., et al. (2015). Endophilin-A2 functions in  
901 membrane scission in clathrin-independent endocytosis. *Nature* 517, 493-+. 10.1038/nature14064.

902 Renard, H.F., Tyckaert, F., Lo Giudice, C., Hirsch, T., Valades-Cruz, C.A., Lemaigre, C., Shafaq-  
903 Zadah, M., Wunder, C., Wattiez, R., Johannes, L., et al. (2020). Endophilin-A3 and Galectin-8  
904 control the clathrin-independent endocytosis of CD166. *Nat Commun* 11, 1457. 10.1038/s41467-  
905 020-15303-y.

906 Richmond, J.E., Davis, W.S., and Jorgensen, E.M. (1999). UNC-13 is required for synaptic vesicle  
907 fusion in *C. elegans*. *Nat Neurosci* 2, 959-964. 10.1038/14755.

908 Ringstad, N., Nemoto, Y., and DeCamilli, P. (1997). The SH3p4/Sh3p8/SH3p13 protein family:  
909 Binding partners for synaptojanin and dynamin via a Grb2-like Src homology 3 domain.  
910 *Proceedings of the National Academy of Sciences of the United States of America* 94, 8569-8574.  
911 DOI 10.1073/pnas.94.16.8569.

912 Sargent, D.F., Bean, J.W., and Schwyzer, R. (1988). Conformation and orientation of regulatory  
913 peptides on lipid membranes. Key to the molecular mechanism of receptor selection. *Biophys*  
914 *Chem* 31, 183-193. 10.1016/0301-4622(88)80024-3.

915 Schuske, K.R., Richmond, J.E., Matthies, D.S., Davis, W.S., Runz, S., Rube, D.A., van der Bliek, A.M.,  
916 and Jorgensen, E.M. (2003). Endophilin is required for synaptic vesicle endocytosis by localizing  
917 synaptotagmin. *Neuron* 40, 749-762. Doi 10.1016/S0896-6273(03)00667-6.

918 Shibata, Y., Hu, J., Kozlov, M.M., and Rapoport, T.A. (2009). Mechanisms shaping the membranes of  
919 cellular organelles. *Annu Rev Cell Dev Biol* 25, 329-354. 10.1146/annurev.cellbio.042308.113324.

920 Snead, D., Wragg, R.T., Dittman, J.S., and Eliezer, D. (2014). Membrane curvature sensing by the C-  
921 terminal domain of complexin. *Nat Commun* 5, 4955. 10.1038/ncomms5955.

922 Sodt, A.J., and Pastor, R.W. (2014). Molecular modeling of lipid membrane curvature induction by a  
923 peptide: more than simply shape. *Biophys J* 106, 1958-1969. 10.1016/j.bpj.2014.02.037.

924 Stachowiak, J.C., Schmid, E.M., Ryan, C.J., Ann, H.S., Sasaki, D.Y., Sherman, M.B., Geissler, P.L.,  
925 Fletcher, D.A., and Hayden, C.C. (2012). Membrane bending by protein-protein crowding. *Nat Cell*  
926 *Biol* 14, 944-949. 10.1038/ncb2561.

927 Suresh, S., and Edwardson, J.M. (2010). The endophilin N-BAR domain perturbs the structure of lipid  
928 bilayers. *Biochemistry* 49, 5766-5771. 10.1021/bi100760e.

929 Vanni, S., Vamparys, L., Gautier, R., Drin, G., Etchebest, C., Fuchs, P.F., and Antonny, B. (2013).  
930 Amphipathic lipid packing sensor motifs: probing bilayer defects with hydrophobic residues.  
931 *Biophys J* 104, 575-584. 10.1016/j.bpj.2012.11.3837.

932 Vazquez, F.X., Unger, V.M., and Voth, G.A. (2013). Autoinhibition of endophilin in solution via  
933 interdomain interactions. *Biophys J* 104, 396-403. 10.1016/j.bpj.2012.12.009.

934 Ventimiglia, D., and Bargmann, C.I. (2017). Diverse modes of synaptic signaling, regulation, and  
935 plasticity distinguish two classes of *C. elegans* glutamatergic neurons. *Elife* 6.  
936 10.7554/eLife.31234.

937 Verstreken, P., Kjaerulff, O., Lloyd, T.E., Atkinson, R., Zhou, Y., Meinertzhagen, I.A., and Bellen, H.J.  
938 (2002). Endophilin Mutations Block Clathrin-Mediated Endocytosis but Not Neurotransmitter  
939 Release. *Cell* 109, 101-112. [https://doi.org/10.1016/S0092-8674\(02\)00688-8](https://doi.org/10.1016/S0092-8674(02)00688-8).

940 Wang, Q., Kaan, H.Y., Hooda, R.N., Goh, S.L., and Sondermann, H. (2008). Structure and plasticity  
941 of Endophilin and Sorting Nexin 9. *Structure* 16, 1574-1587. 10.1016/j.str.2008.07.016.

942 Watanabe, S., Liu, Q., Davis, M.W., Hollopeter, G., Thomas, N., Jorgensen, N.B., and Jorgensen,  
943 E.M. (2013a). Ultrafast endocytosis at *Caenorhabditis elegans* neuromuscular junctions. *Elife* 2.  
944 ARTN e00723  
945 10.7554/eLife.00723.

946 Watanabe, S., Mamer, L.E., Raychaudhuri, S., Luvsanjav, D., Eisen, J., Trimbuch, T., Sohl-  
947 Kielczynski, B., Fenske, P., Milosevic, I., Rosenmund, C., and Jorgensen, E.M. (2018).  
948 Synaptojanin and Endophilin Mediate Neck Formation during Ultrafast Endocytosis. *Neuron* 98,  
949 1184-+. 10.1016/j.neuron.2018.06.005.

950 Watanabe, S., Rost, B.R., Camacho-Perez, M., Davis, M.W., Sohl-Kielczynski, B., Rosenmund, C.,  
951 and Jorgensen, E.M. (2013b). Ultrafast endocytosis at mouse hippocampal synapses. *Nature* 504,  
952 242-+. 10.1038/nature12809.

953 Watanabe, S., Trimbuch, T., Camacho-Perez, M., Rost, B.R., Brokowski, B., Sohl-Kielczynski, B.,  
954 Felies, A., Davis, M.W., Rosenmund, C., and Jorgensen, E.M. (2014). Clathrin regenerates  
955 synaptic vesicles from endosomes. *Nature* 515, 228-U168. 10.1038/nature13846.

956 Weissenhorn, W. (2005). Crystal structure of the endophilin-A1 BAR domain. *J Mol Biol* 351, 653-661.  
957 10.1016/j.jmb.2005.06.013.

958 Wragg, R.T., Snead, D., Dong, Y., Ramlall, T.F., Menon, I., Bai, J., Eliezer, D., and Dittman, J.S.  
959 (2013). Synaptic vesicles position complexin to block spontaneous fusion. *Neuron* 77, 323-334.  
960 10.1016/j.neuron.2012.11.005.

961

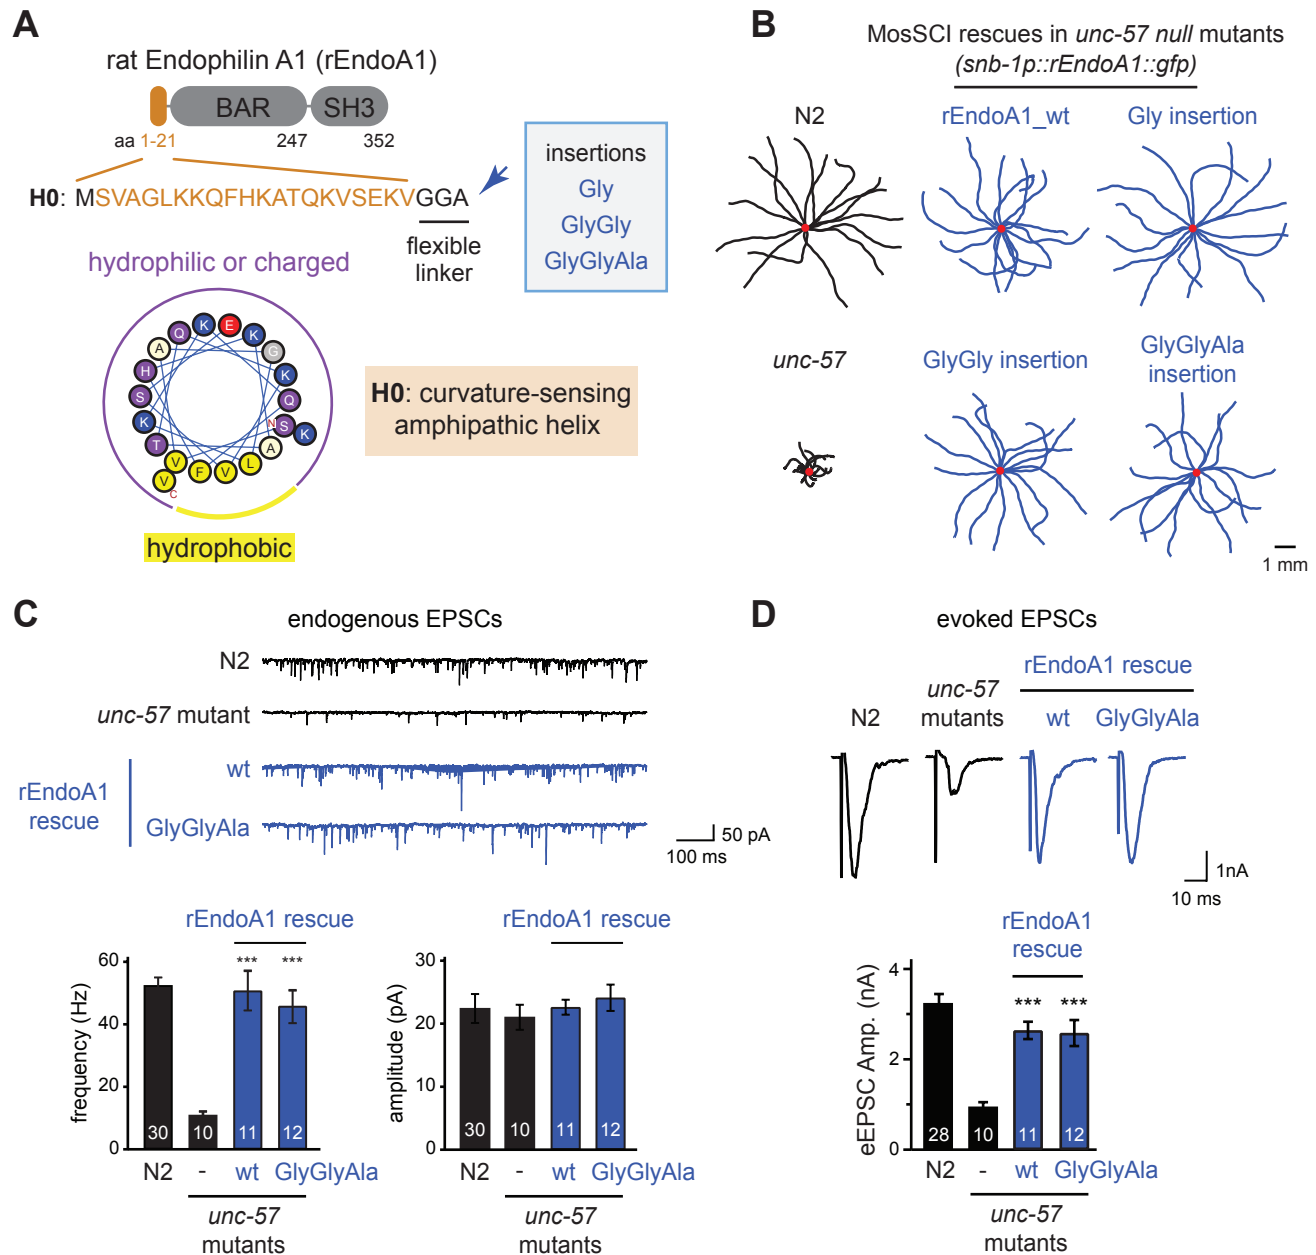

Figure 1

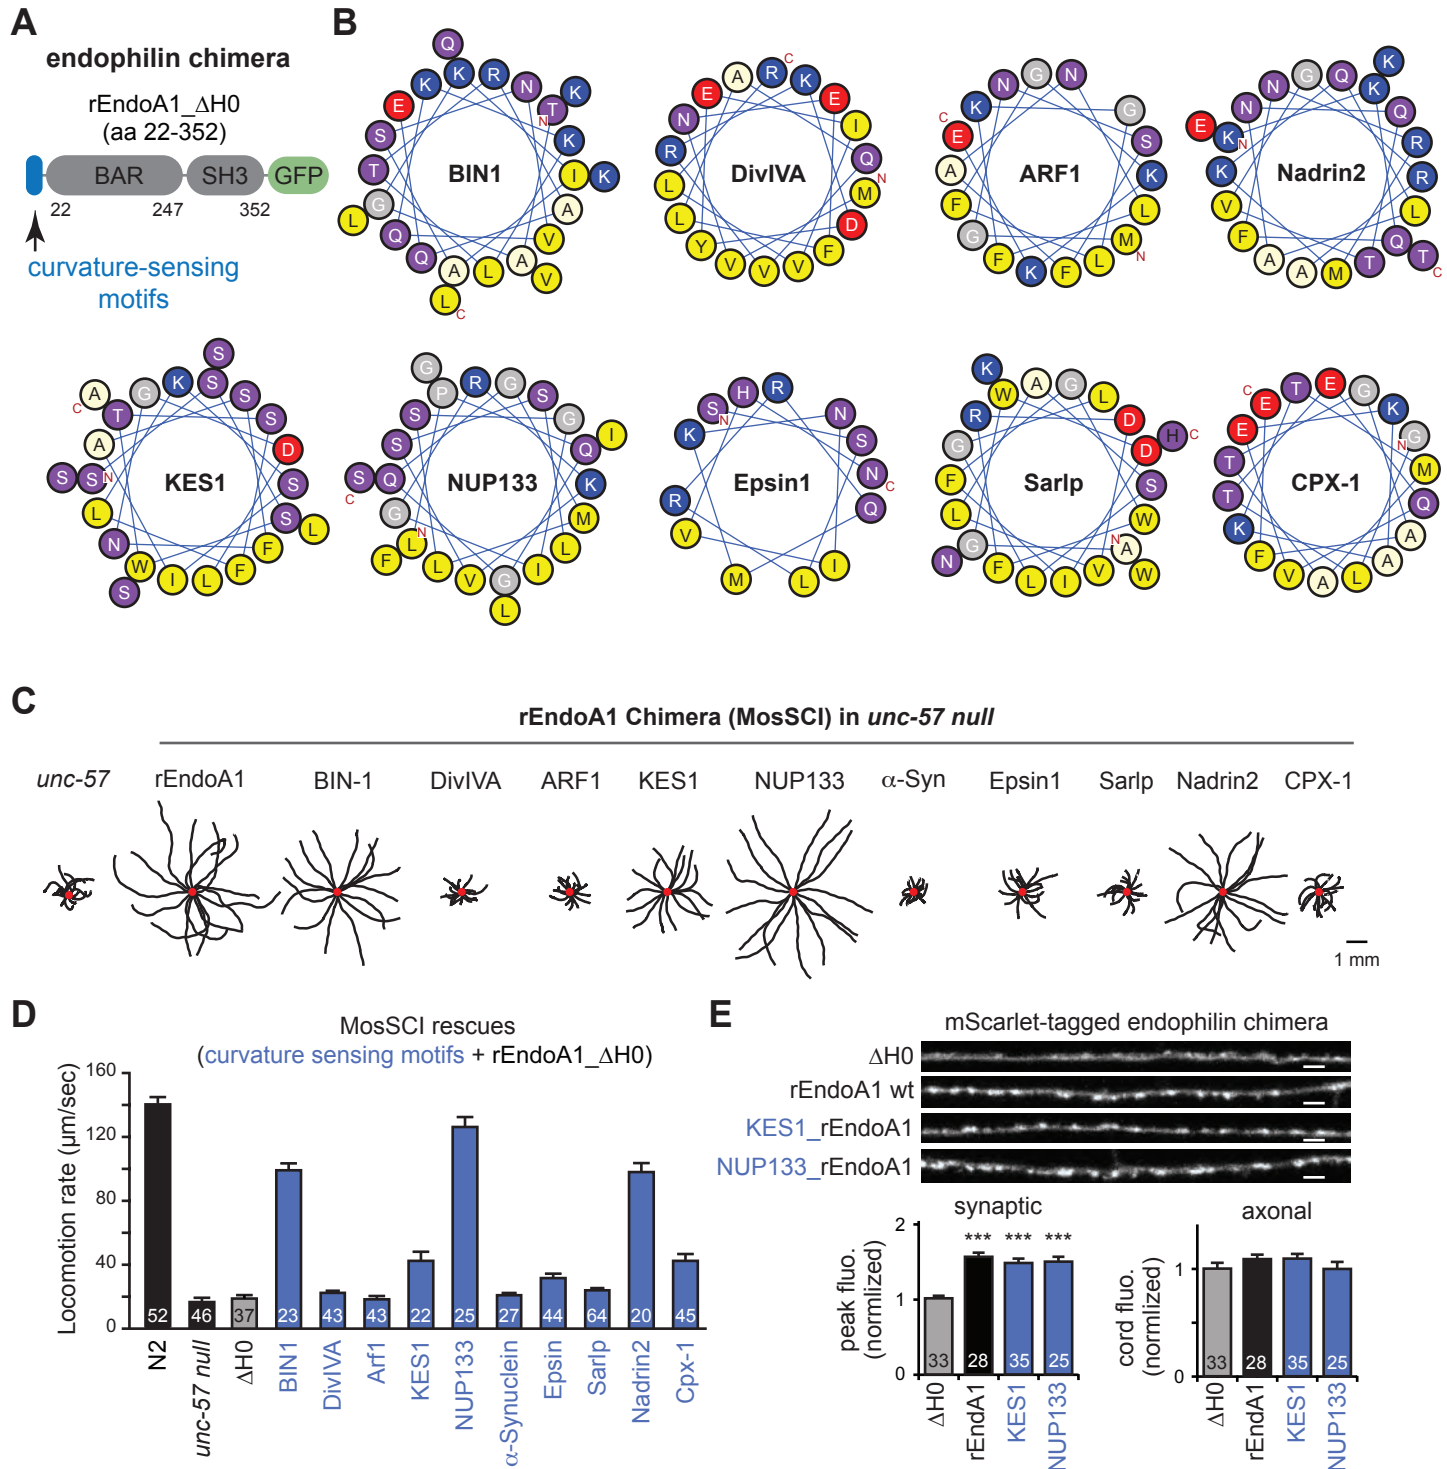

Figure 2

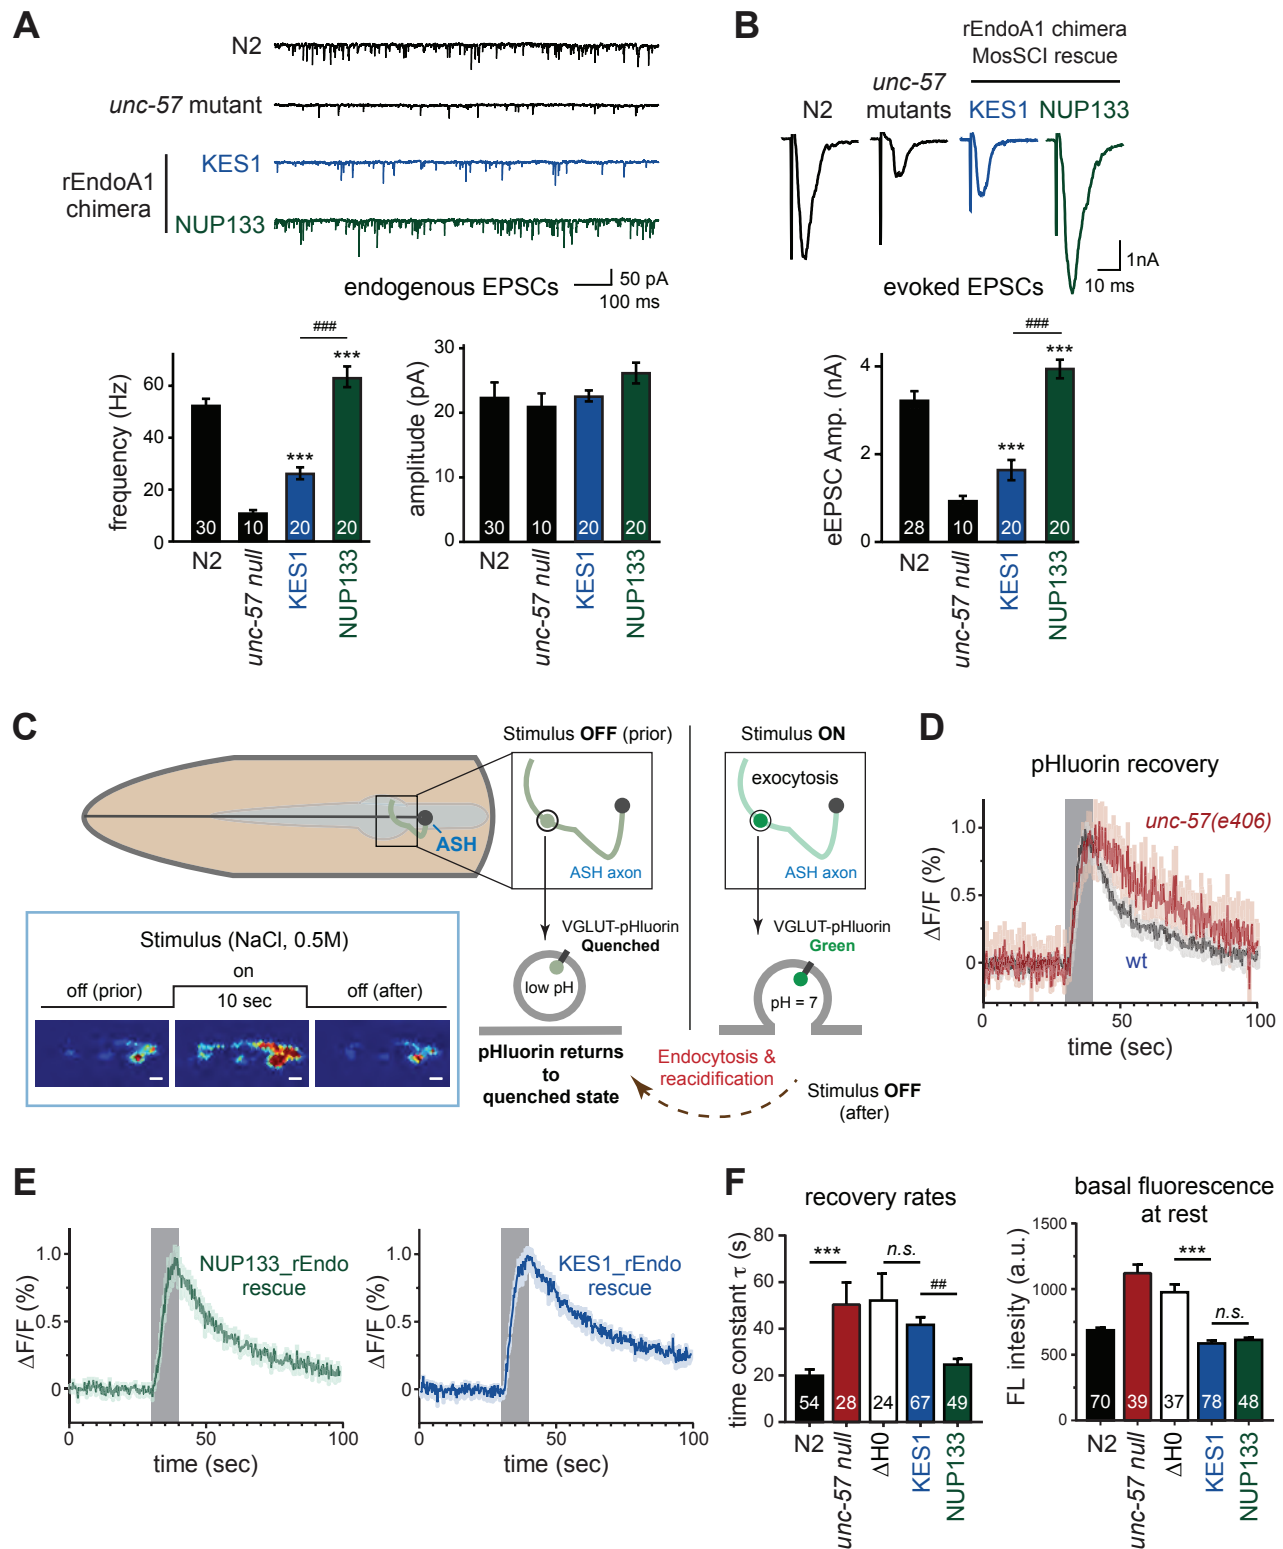

Figure 3

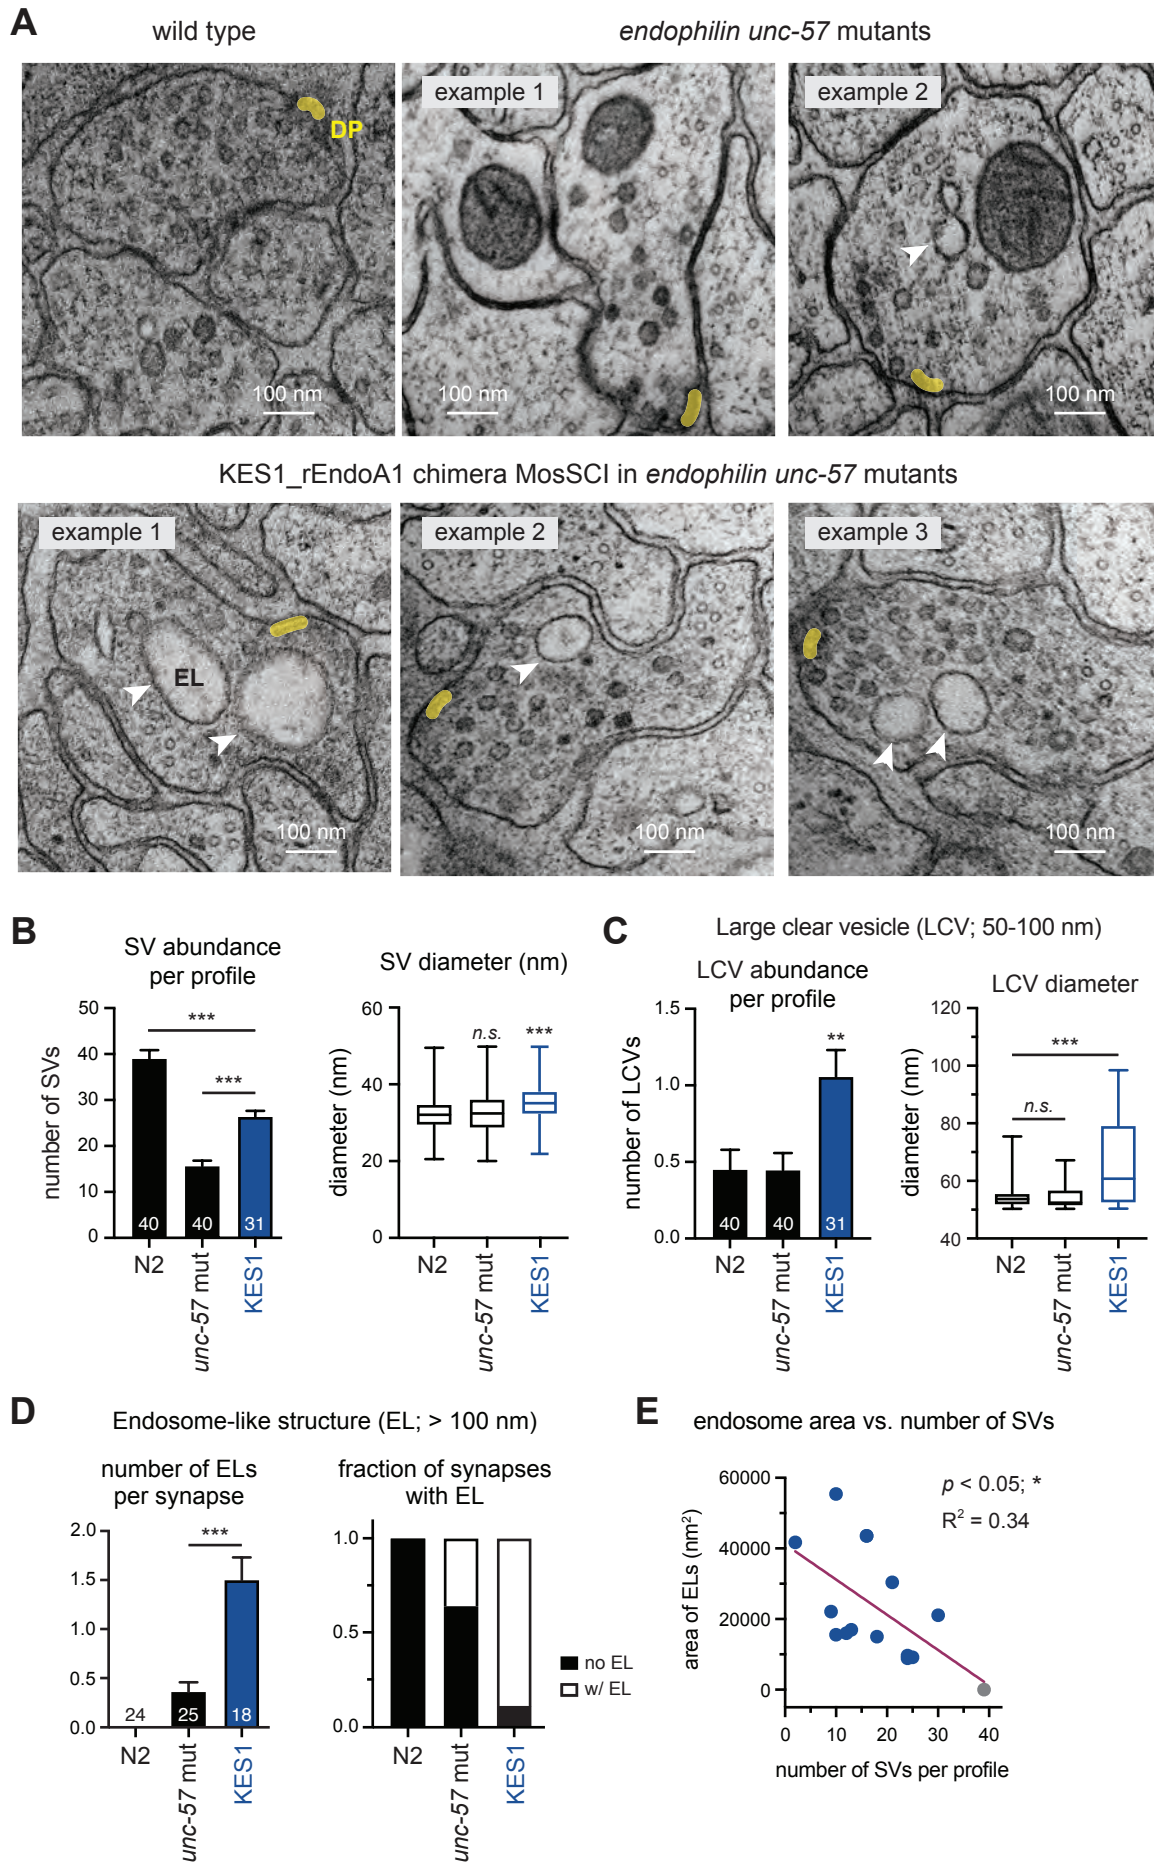

**Figure 4**

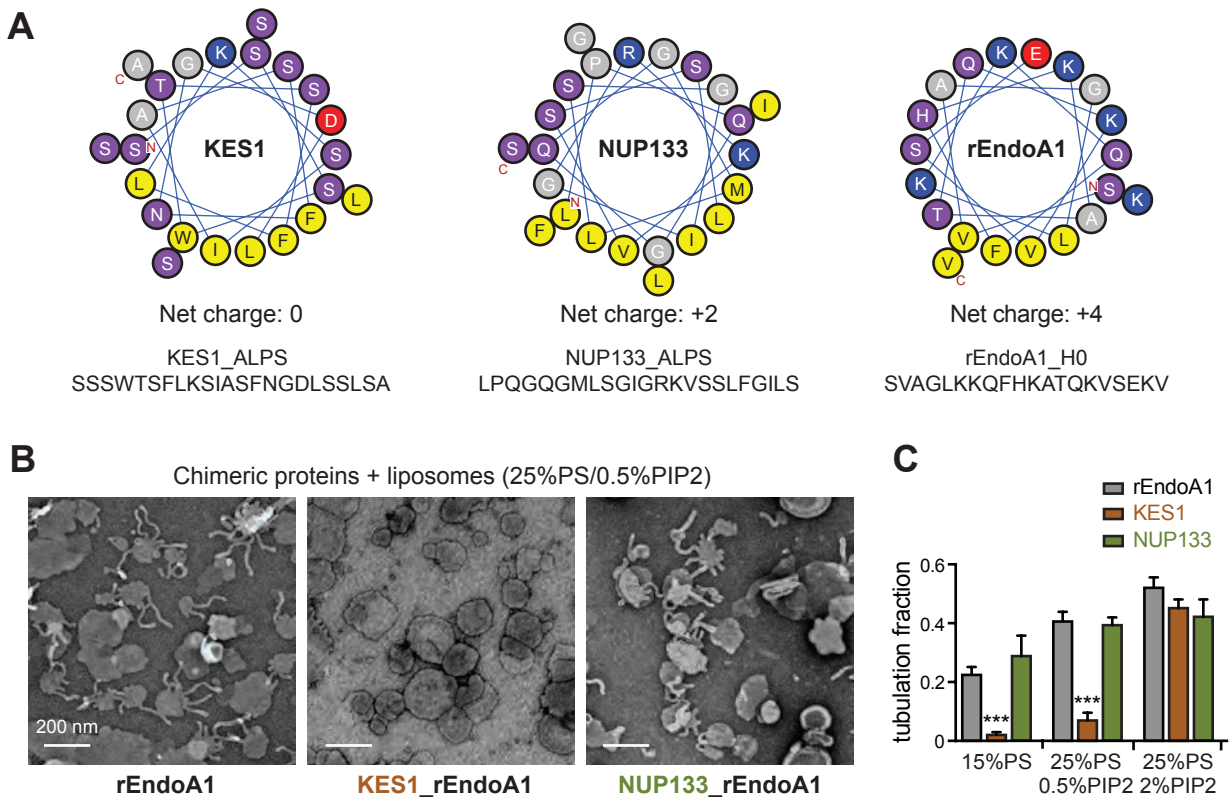

**Figure 5**



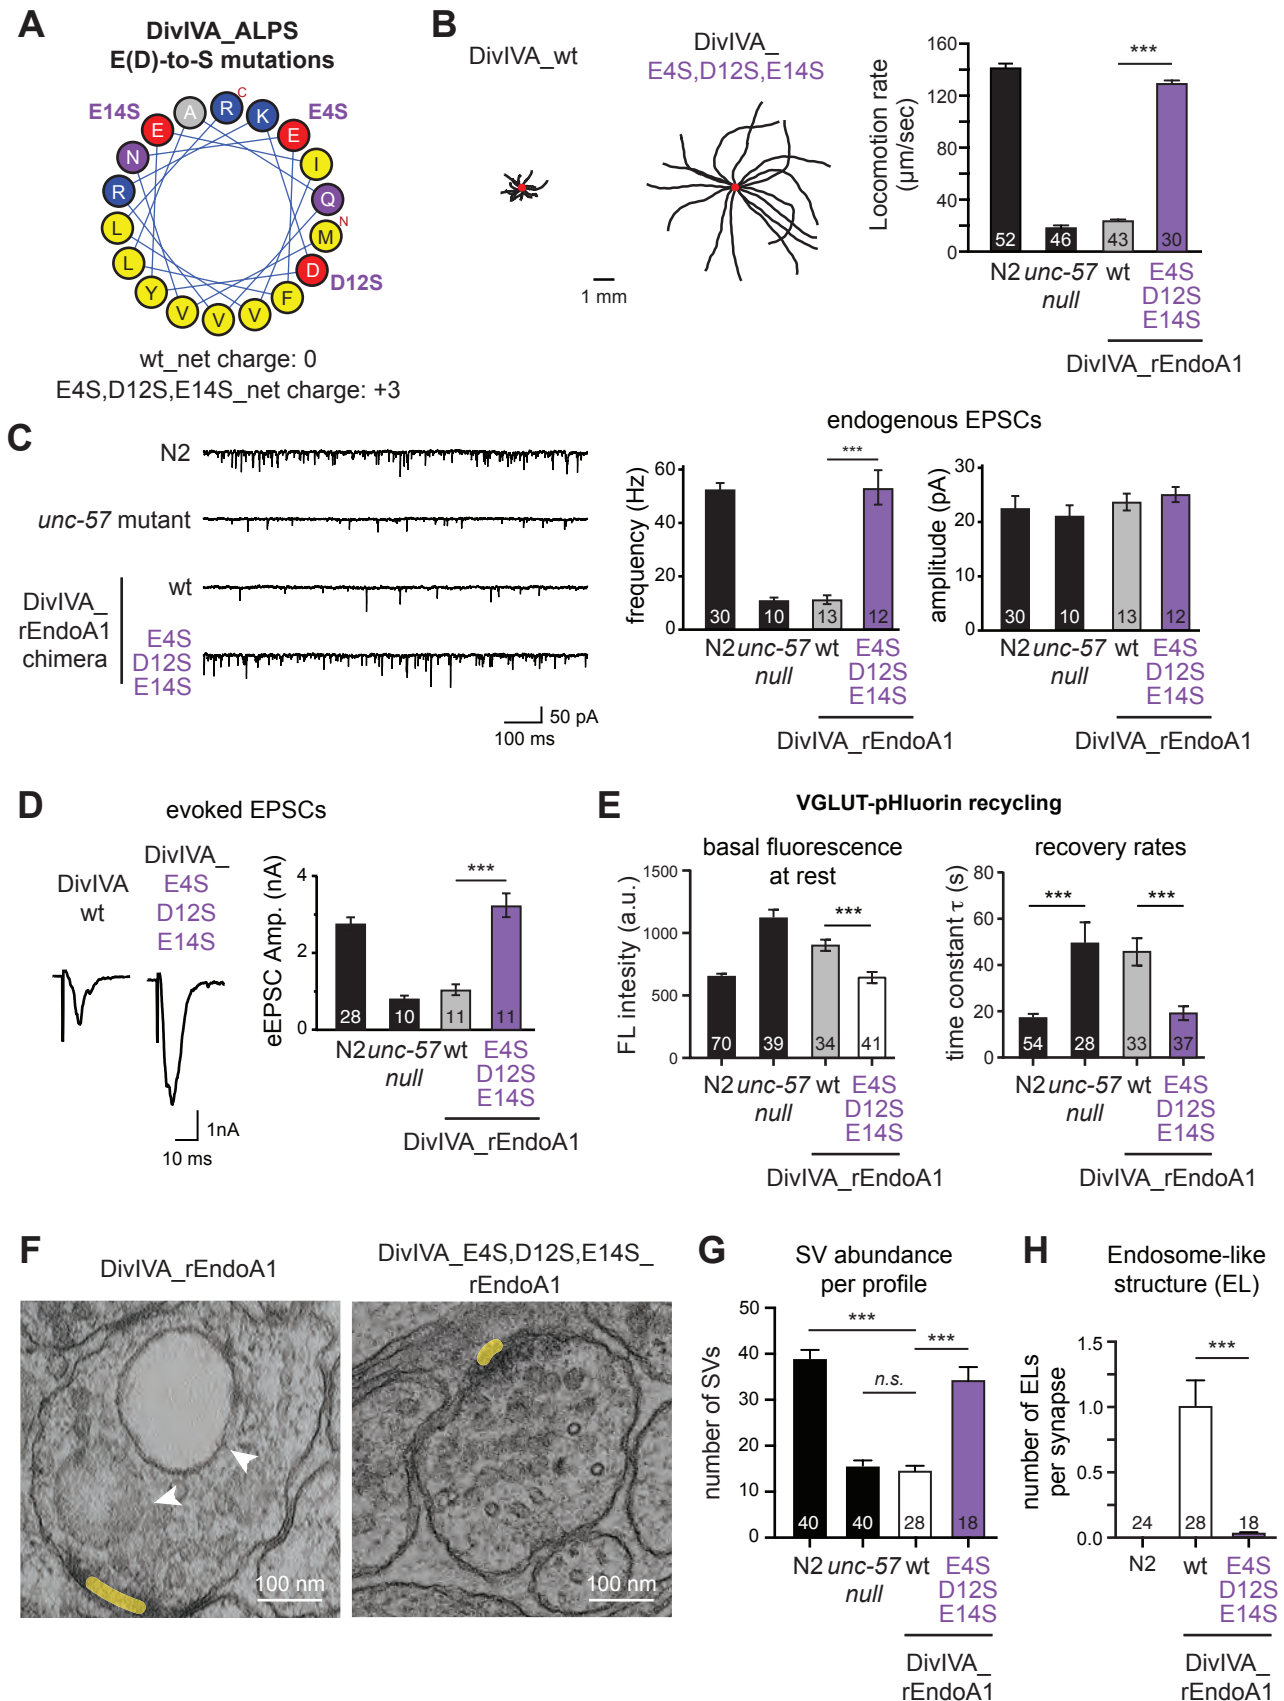

Figure 7

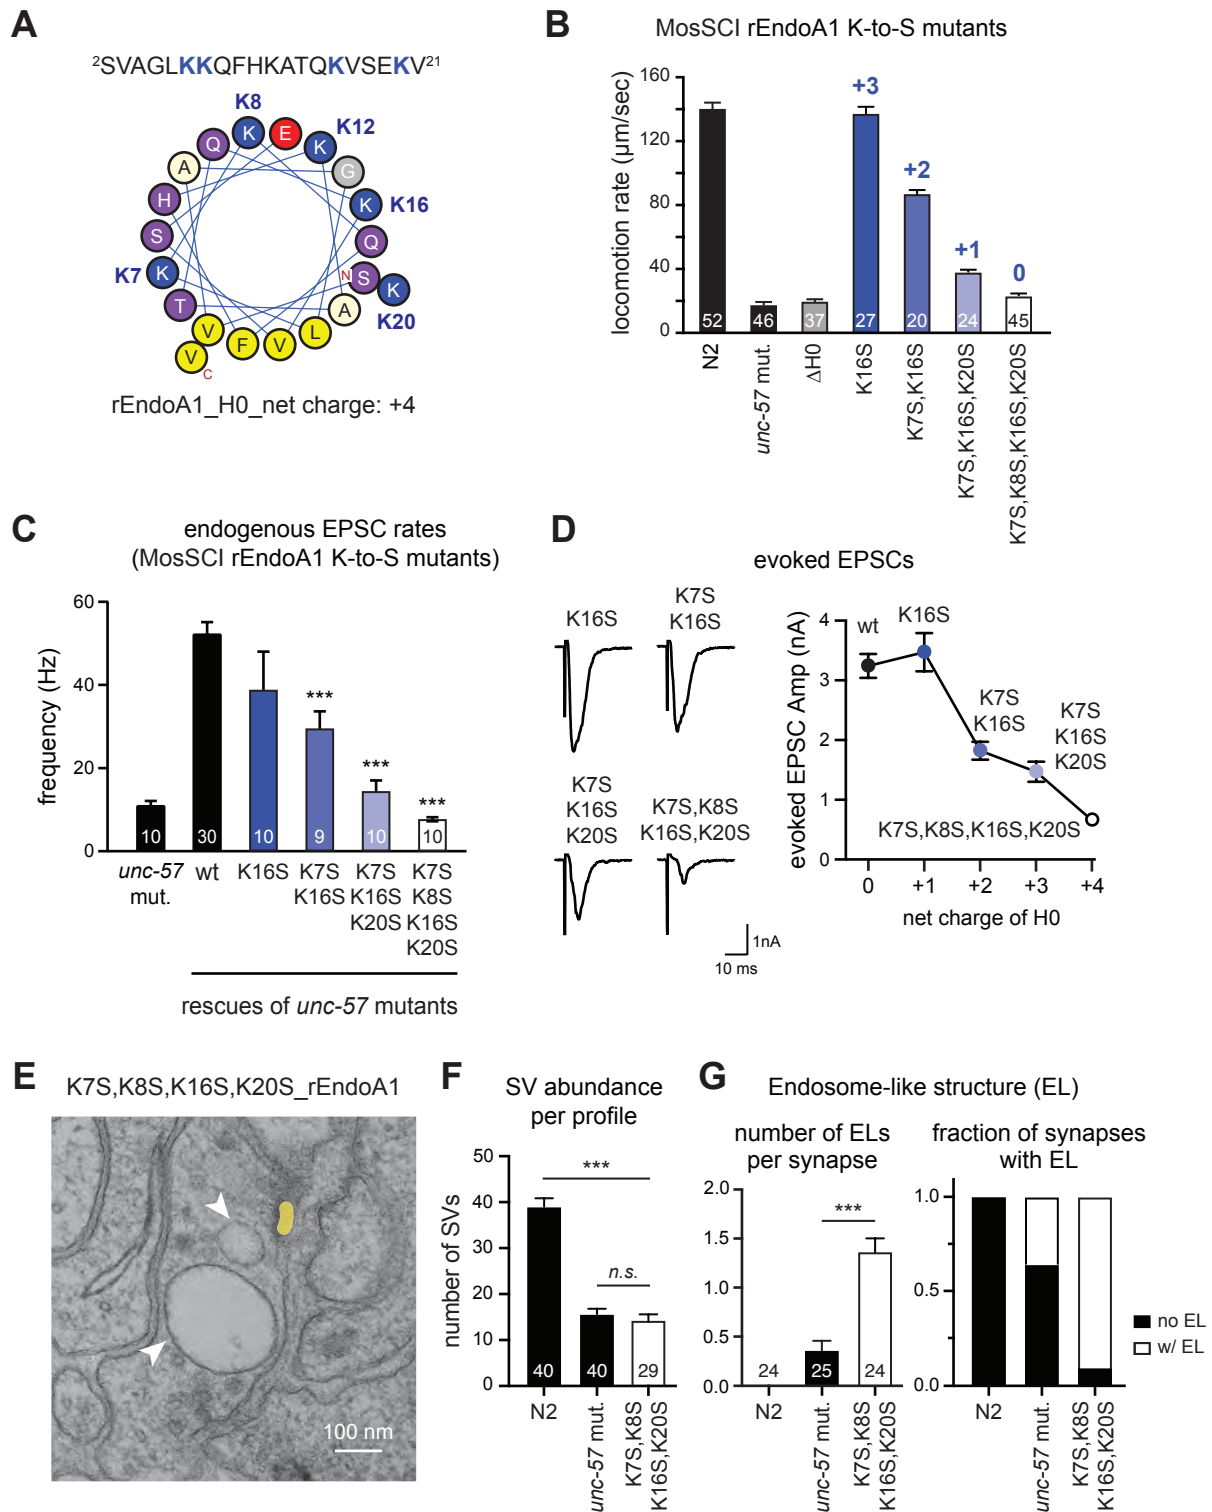

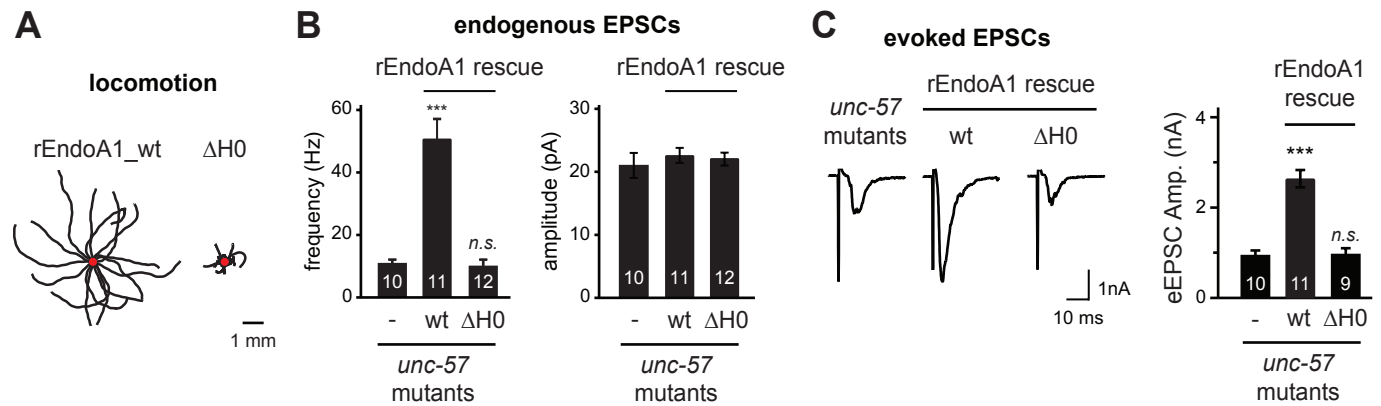

Suppl. figure 1

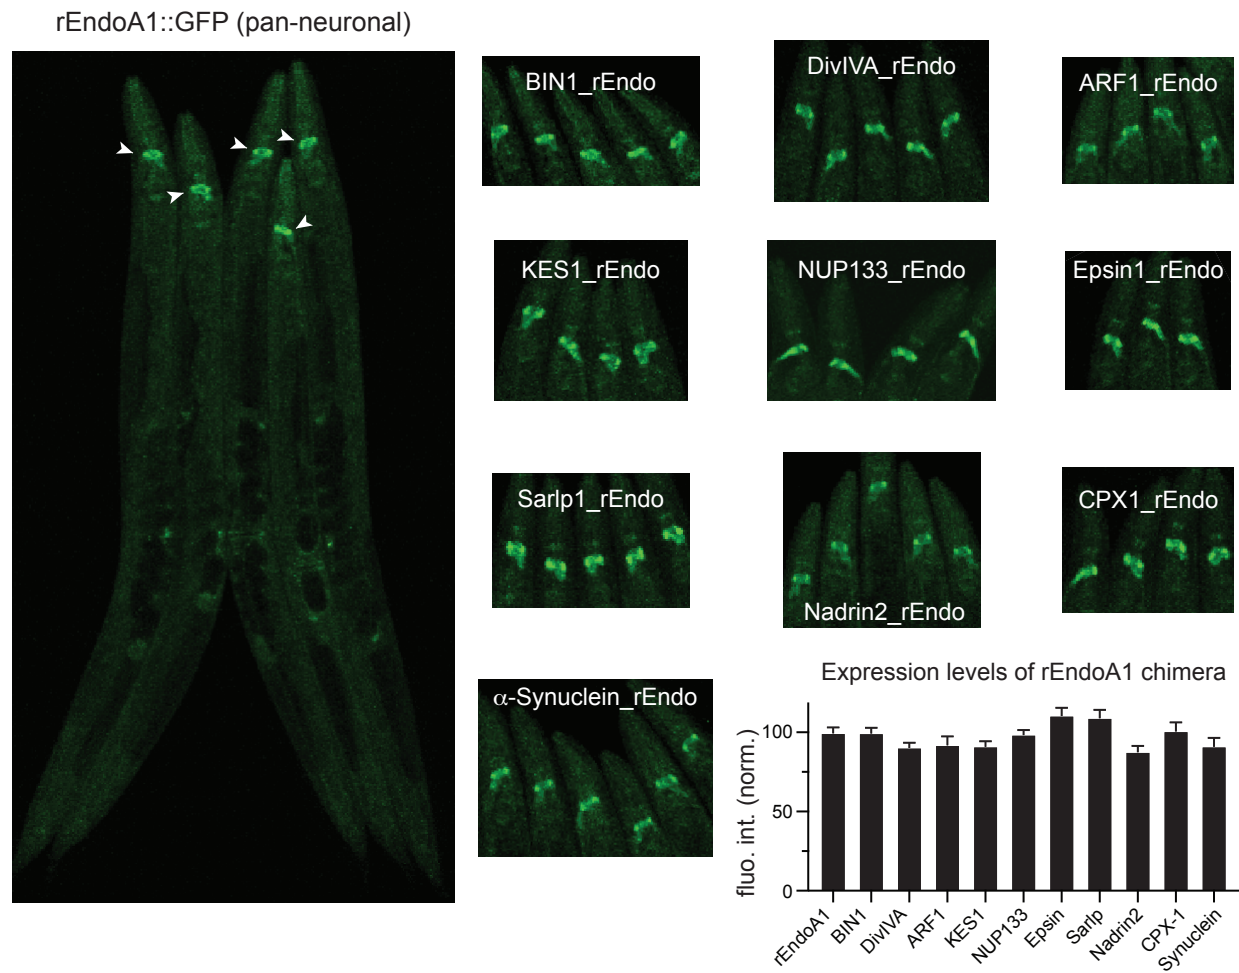

Suppl. figure 2

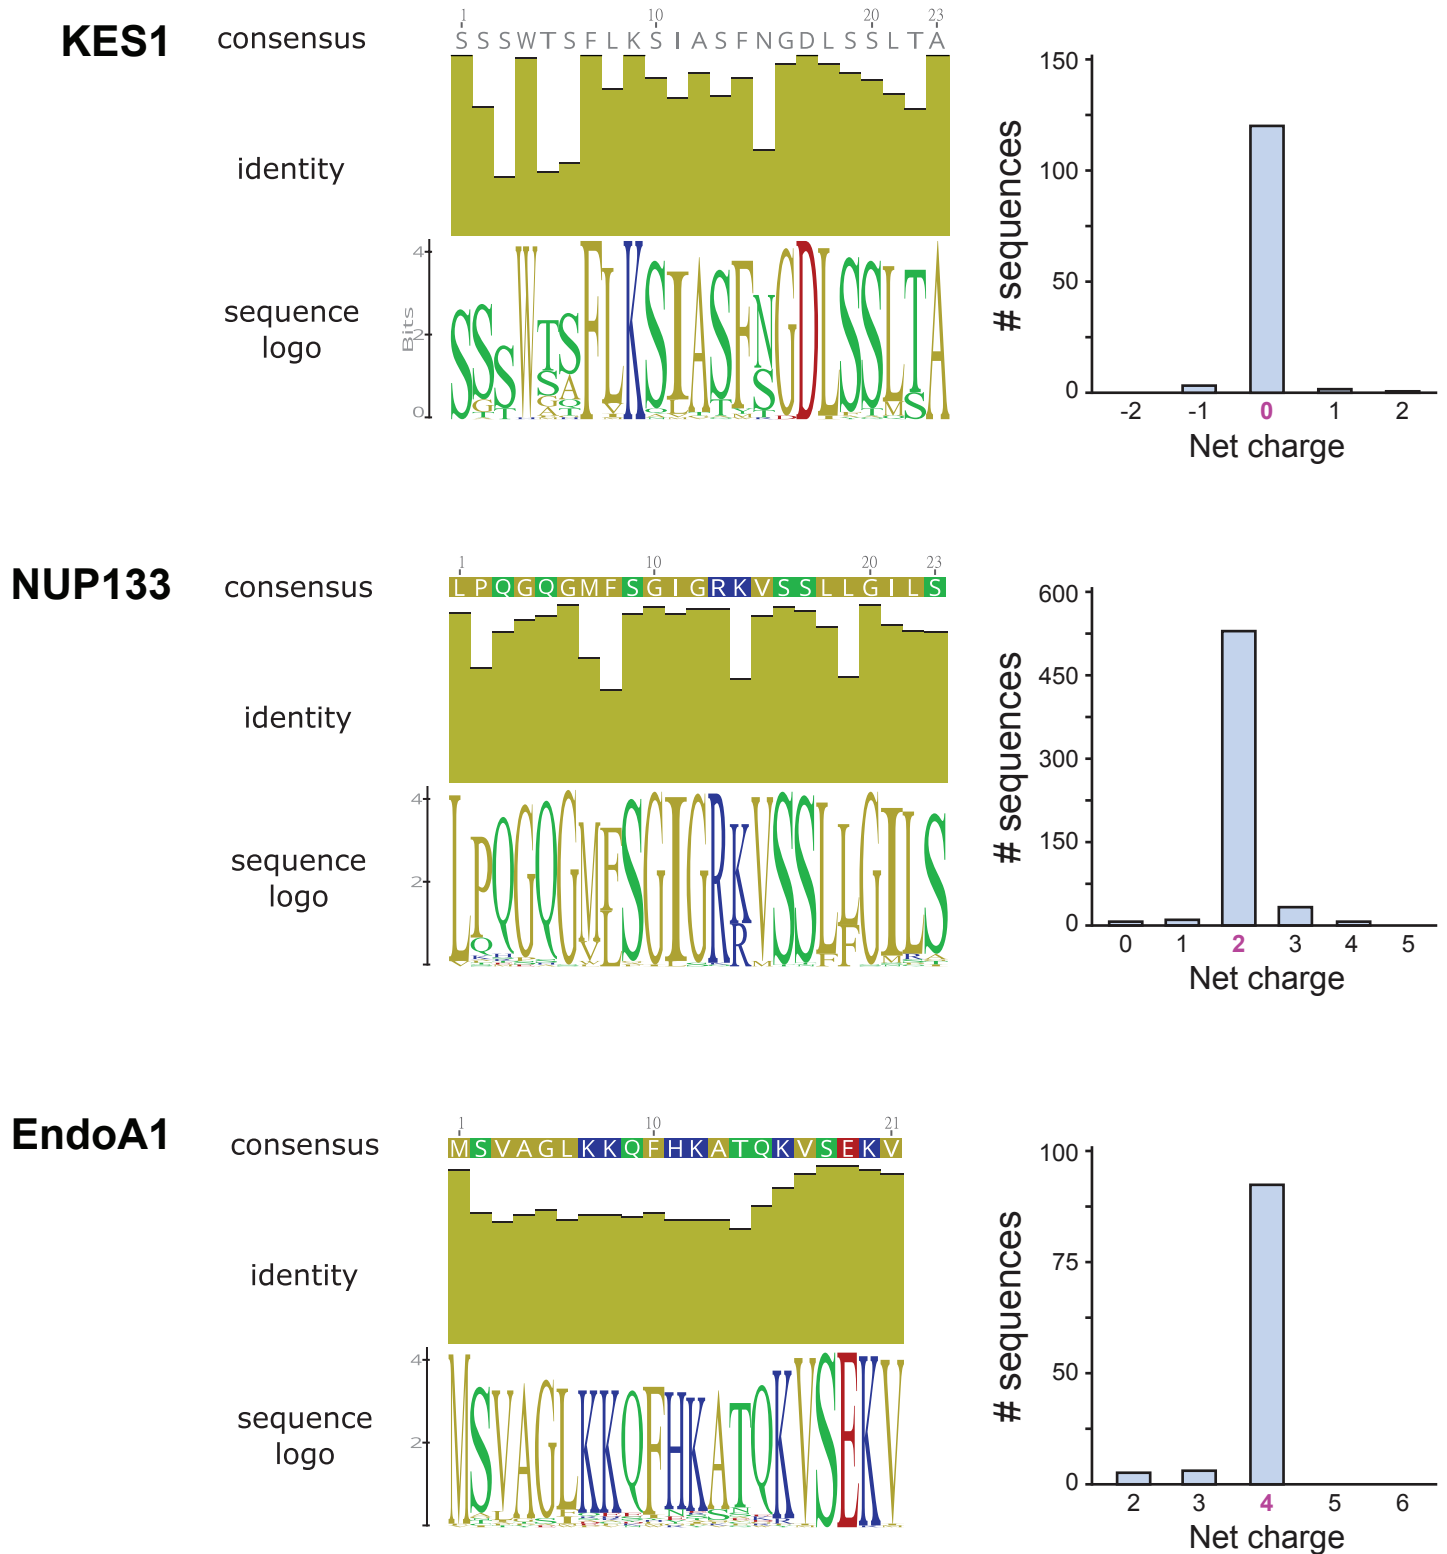

Suppl. figure 3

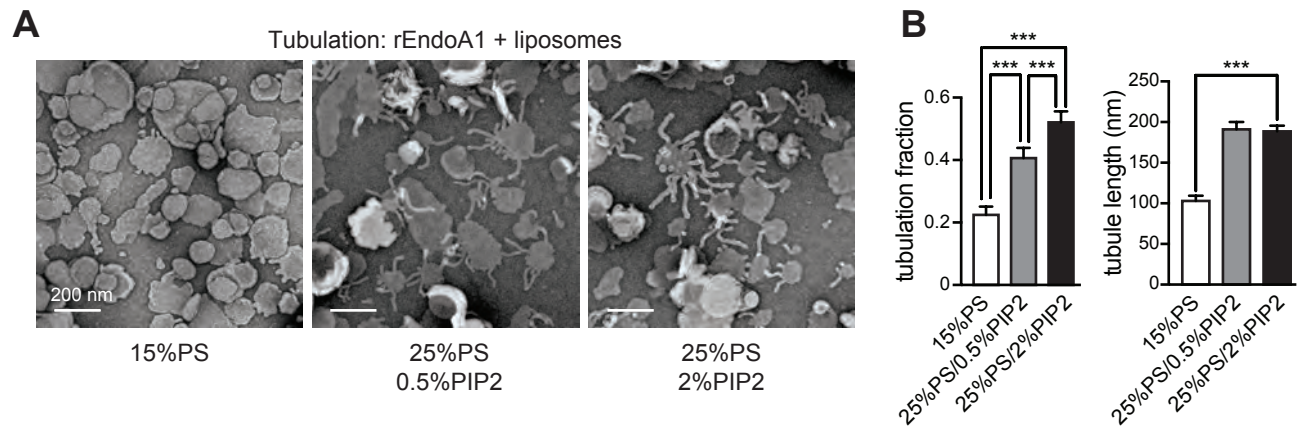

Suppl. figure 4

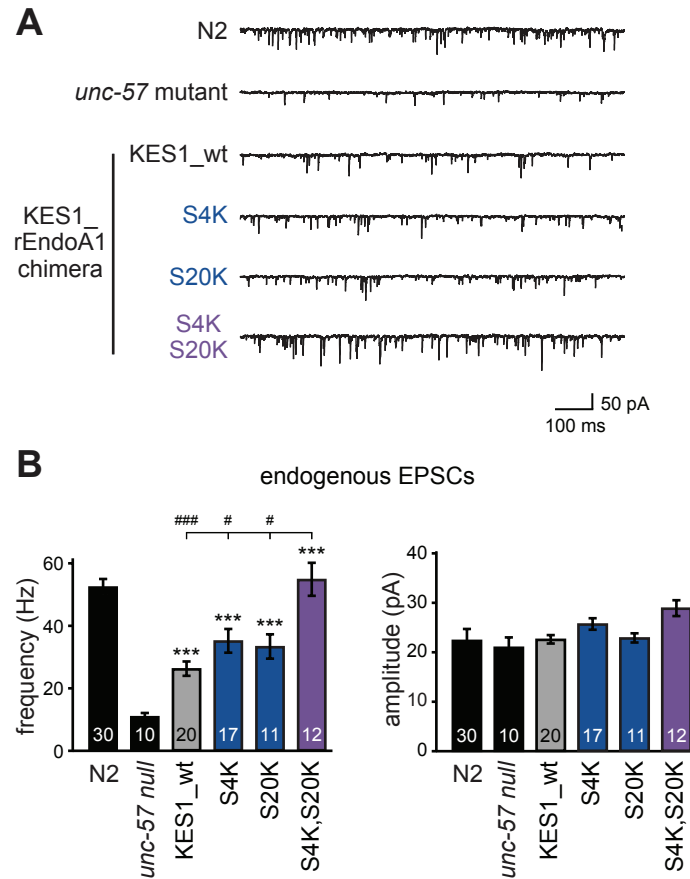

Suppl. figure 5

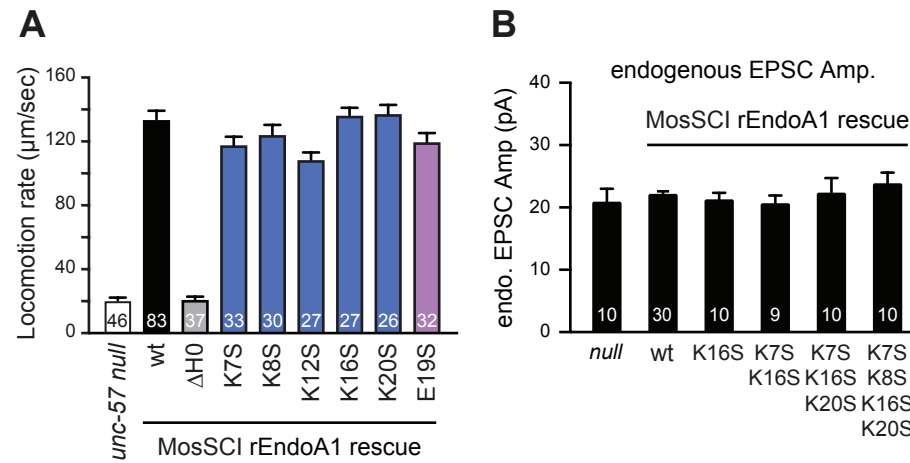

Suppl. figure 6
